# Supplementary material for: Post-marketing withdrawal of 462 medicinal products because of adverse drug reactions: a systematic review of the world literature
Source: Springer Nature journal article supplement (doi:10.1186/s12916-016-0553-2), 2016-01-25
Supplement: MOESM1 [file 9759256]

**Additional file 1: Web 1.** List of English Language drug regulatory websites searched for information on medicinal products withdrawn from the market because of adverse drug reactions.

1. **Australia:** Therapeutic Goods Administration (TGA): <https://www.tga.gov.au/>
2. **Bahamas:** Bahamas National Drug Agency (BNDA): <http://www.corp.phabahamas.org/hospitals-services/bnda/>
3. **Bhutan:** Drug Regulatory Authority: <http://dra.gov.bt/>
4. **Botswana:** Ministry of Health, Republic of Botswana: <http://www.moh.gov.bw/> (no Medicines Regulatory Authority)
5. **Canada:** Health Canada Drug Product Database (DPD): <http://www.hc-sc.gc.ca/dhp-mps/prodpharma/databasdon/index-eng.php>
6. **Europe:** European Medicines Agency (EMA): <http://www.ema.europa.eu/ema/>
7. **Gambia:** Medicine Regulatory Authority newly established
8. **Ghana:** Ghana Food and Drugs Authority (FDA): <http://www.fdaghana.gov.gh/>
9. **India:** Central Drugs Standard Control Organization (CDSCO): <http://www.cdsc0.nic.in/forms/Default.aspx>
10. **Jamaica:** Ministry of Health, Kingston, Jamaica: <http://moh.gov.jm/?s=drug+regulation>
11. **Kenya:** Pharmacy and Poisons Board, Kenya: <http://pharmacyboardkenya.org/>
12. **Liberia:** Liberian Medicines Health Products Regulatory Authority: [https://healthresearchweb.org/en/liberia/research\\_regulation\\_4284](https://healthresearchweb.org/en/liberia/research_regulation_4284) (no drug information; email delivery system failed)
13. **Malta:** Malta Medicines Authority: <http://www.medicinesauthority.gov.mt/home?l=1>
14. **Namibia:** Namibia Medicines Regulatory Council: <http://www.nmrc.com.na/>
15. **New Zealand:** New Zealand Medicines and Medical Devices Safety Authority: <http://www.medsafe.govt.nz/index.asp>
16. **Nigeria:** National Agency for Food and Drug Administration and Control (NAFDAC): <http://www.nafdac.gov.ng/>
17. **Pakistan:** Drug Regulatory Authority of Pakistan (DRAP): <http://www.dra.gov.pk/gop/index.php?q=aHR0cDovLzE5Mi4xNjguNzAuMTM2L2RyYXAy>
18. **Philippines:** Food and Drug Administration, Philippines (FDA): <http://www.fda.gov.ph/>
19. **Rwanda:** Ministry of Health, Republic of Botswana: <http://www.moh.gov.rw/index.php?id=2> (no Medicines Regulatory Authority)
20. **Sierra Leone:** Pharmacy Board of Sierra Leone: <http://www.pharmacyboard.gov.sl/>
21. **Singapore:** Health Sciences Authority: <http://www.hsa.gov.sg/content/hsa/en.html>
22. **South Africa:** South Africa Medicines Control Council (MCC): <http://www.mccza.com/>
23. **Sri Lanka:** Cosmetics, Devices and Drug Regulatory Authority: <http://www.cdda.gov.lk/>
24. **Tanzania:** Tanzania Food and Drugs Authority (TFDA): <http://www.tfda.or.tz/>
25. **Thailand:** Food and Drug Administration, Thailand: <http://www.fda.moph.go.th/eng/index.stm>
26. **Trinidad and Tobago:** Ministry of Health, Trinidad and Tobago: <http://www.health.gov.tt/sitepages/default.aspx?id=93>
27. **Uganda:** National Drug Authority: <http://www.nda.or.ug/>

28. **United Kingdom:** Medicines and Healthcare products Regulatory Agency (MHRA): <https://www.gov.uk/government/organisations/medicines-and-healthcare-products-regulatory-agency>
29. **USA:** Food and Drug Administration (FDA): <http://www.fda.gov/>
30. **Zambia:** Pharmaceutical Regulatory Authority (PRA): <http://www.zamra.co/>
31. **Zimbabwe:** Medicines Control Authority of Zimbabwe (MCAZ): <http://www.mcaz.co.zw/>
