# Supplementary material for: Post-marketing withdrawal of 462 medicinal products because of adverse drug reactions: a systematic review of the world literature
Source: Springer Nature journal article supplement (doi:10.1186/s12916-016-0553-2), 2016-01-25
Supplement: MOESM2 [file 9759256]

**Additional file 2: Web 2.** Medline search strategy for identification of report dates for first report of adverse drug reaction or first date of withdrawal

“[Drug name]” AND “toxicity”

“[Drug name]” AND “adverse”

“[Drug name]” AND “side effect”

“[Drug name]” AND “poison”

“[Drug name]” AND “fatal\*”

“[Drug name]” AND “fatality”

“[Drug name]” AND “death”

“[Drug name]” AND “withdrawal”

“[Drug name]” AND “withdrawn”

“[Drug name]” AND “recall”

“[Drug name]” AND “voluntary recall”

“[Drug name]” AND “banned”

“[Drug name]” AND “prohibited”

“[Drug name]” AND “remov\*”

“[Drug name]” AND “discontinued”

“[Drug name]” AND “refus\*”

[Sort by Publication date]
