# Supplementary material for: Post-marketing withdrawal of 462 medicinal products because of adverse drug reactions: a systematic review of the world literature
Source: Springer Nature journal article supplement (doi:10.1186/s12916-016-0553-2), 2016-01-25
Supplement: MOESM3 [file 9759256]

**E-appendix Table 1: List of medicinal products withdrawn because of adverse drug reactions.**

| Medicinal product                  | Class             | Mechanism of action                            | Therapeutic indication   | Launch date | Year of first ADR report | Year first withdrawn | Countries withdrawn                                                                                         | Reason for withdrawal                      | Level of evidence† |
|------------------------------------|-------------------|------------------------------------------------|--------------------------|-------------|--------------------------|----------------------|-------------------------------------------------------------------------------------------------------------|--------------------------------------------|--------------------|
| Acetanilide                        | Analgesic         | Metabolised to paracetamol                     | Analgesia                | 1886        | 1940                     | 1971                 | Japan                                                                                                       | Aplastic anemia                            | 4                  |
| Acetarsol                          | Antimicrobial     | Unknown                                        | Syphilis, trichomoniasis | 1921        | 1941                     | 1982                 | Mauritius                                                                                                   | Hematologic                                | 4                  |
| Acetylfuratrizine                  | Antimicrobial     | Damages ribosomal proteins                     | Bacterial infection      | 1962        | 1977                     | 1977                 | Japan, Saudi Arabia, Venezuela                                                                              | Superseded by safer products: carcinogenic | 5*                 |
| Acitretin                          | Retinoid          | Binds to the retinoic acid receptor (RAR)      | Psoriasis                | 1989        | 1989                     | 1990                 | Netherlands, France                                                                                         | Teratogenicity                             | 5*                 |
| Acridine derivatives               | Antimicrobial     |                                                | Topical disinfectant     | 1922        | 1975                     | 1979                 | Denmark, Venezuela                                                                                          | Mutagenic                                  | 5*                 |
| Adenosine phosphate                | Antiarrhythmic    | Direct nodal inhibition                        | Cardiac arrhythmia       | 1930        | 1957                     | 1973                 | USA                                                                                                         | Cardiovascular                             | 4                  |
| Alatrofloxacin                     | Antimicrobial     | Inhibit DNA gyrase                             | Bacterial infection      | 1997        | 1998                     | 2000                 | Armenia, Singapore, Europe                                                                                  | Liver                                      | 4                  |
| Alclofenac                         | Analgesic         | Inhibit COX-1 & COX-2                          | Analgesia                | 1972        | 1974                     | 1977                 | Ireland, Cyprus, Germany, UK, Italy, New Zealand, Egypt, Greece, Denmark, Indonesia, India, Jordan, Morocco | Immunologic, liver, skin, urinary tract    | 4                  |
| Aliskiren                          | Antihypertensive  | Direct renin inhibitor                         | Hypertension             | 2007        | 2011                     | 2011                 | Europe                                                                                                      | Angioedema                                 | 4                  |
| Alosetron‡                         | Antispasmodic     | 5HT3 receptor antagonist                       | Irritable bowel syndrome | 2000        | 2000                     | 2000                 | USA                                                                                                         | Gastrointestinal                           | 4                  |
| Alphacetylmethadol                 | Analgesic         | OP1 receptor agonist                           | Analgesia                | 1993        | 2001                     | 2003                 | USA                                                                                                         | Cardiovascular                             | 4                  |
| Alpidem‡                           | Anxiolytic        | GABA-A receptor antagonist                     | Anxiety                  | 1991        | 1994                     | 1994                 | France                                                                                                      | Liver                                      | 4                  |
| Althesin (alphadolone/alphaxolone) | Sedative-hypnotic | Potentialiation of the GABA-A chloride channel | Anesthesia               | 1972        | 1973                     | 1984                 | UK, Germany, France                                                                                         | Immunologic                                | 4                  |
| Amfepramone                        | Psychostimulant   | Norepinephrine releasing agent                 | Obesity                  | 1957        | 1974                     | 1975                 | Turkey, Sweden, Oman, UAE, Norway, Venezuela, EU, France, UK                                                | Cardiotoxicity                             | 4                  |
| Amphetamine                        | Psychostimulant   | TAAR1 agonist                                  | Obesity                  | 1939        | 1957                     | 1973                 | USA, UAE, Turkey, Oman, Malaysia, Nigeria                                                                   | Drug dependence                            | 4                  |
| Amineptine                         | Antidepressant    | Dopamine receptor antagonist                   | Depression               | 1960        | 1984                     | 1999                 | France, Thailand, UAE, Bangladesh, Morocco, Vietnam                                                         | Drug dependence, liver, skin               | 4                  |
| Aminoglutethimide                  | Anxiolytic        | Steroid synthesis inhibitor                    | Anxiety                  | 1960        | 1966                     | 1966                 | US, Saudi Arabia, Norway                                                                                    | Endocrine                                  | 4                  |

|                                   |                           |                                                        |                                              |      |      |      |                                                                                                                                                           |                                   |    |
|-----------------------------------|---------------------------|--------------------------------------------------------|----------------------------------------------|------|------|------|-----------------------------------------------------------------------------------------------------------------------------------------------------------|-----------------------------------|----|
| Aminophenazone ‡<br>(aminopyrine) | Analgesic                 | Inhibit COX-1 & COX-2                                  | Analgesia                                    | 1887 | 1936 | 1965 | 10 European, 14 Asian, & 4 African countries; Australia; USA; Canada; Chile; Brazil; Venezuela                                                            | Hematologic, carcinogenic         | 4  |
| Aminophylline                     | Anti-asthmatic            | Nonselective phosphodiesterase inhibitor               | Asthma                                       | 1908 | 1955 | 1992 | Netherlands                                                                                                                                               | Immune-mediated reactions         | 4  |
| Aminorex fumarate                 | Psychostimulant           | Catecholamine release                                  | Obesity                                      | 1962 | 1967 | 1967 | Germany, Venezuela                                                                                                                                        | Respiratory                       | 4  |
| Amobarbital‡                      | Sedative-hypnotic         | GABA-A receptor agonist                                | Hypnosedation                                | 1961 | 1979 | 1985 | Sweden, New Zealand                                                                                                                                       | Respiratory depression            | 4  |
| Amoproxan                         | Antianginal               | Nonselective $\beta$ -blocker                          | Angina                                       | 1969 | 1970 | 1970 | France                                                                                                                                                    | Sensory systems, skin             | 4  |
| Anabolic steroids                 | Hormones                  | Androgen-receptor modulation                           | Aplastic anemia, breast cancer, osteoporosis | 1952 | 1966 | 1989 | Thailand, India                                                                                                                                           | Androgenic effects                | 4  |
| Anagestone acetate                | Hormones                  | Inhibition of ovulation                                | Contraception                                | 1968 | 1969 | 1969 | Worldwide                                                                                                                                                 | Tumorigenicity                    | 5* |
| Anti-D immunoglobulin             | Immune prophylaxis        | Binds to the erythrocyte D antigen                     | Idiopathic thrombocytopenic purpura          | 1968 | 2000 | 2009 | Europe                                                                                                                                                    | Safety concerns: hemoglobinemia,  | 4  |
| Anti-histamine (topical)          | Phenothiazine derivatives | H1-antagonism                                          | Hypersensitivity                             | 1942 | 1947 | 1986 | Malaysia, Sri Lanka                                                                                                                                       | Immune-mediated reactions         | 4  |
| Antrafenine‡                      | Analgesic                 | COX-1 & COX-2 inhibition                               | Analgesia                                    | 1977 | 1979 | 1984 | France                                                                                                                                                    | Urinary tract                     | 4  |
| Aprobarbital‡                     | Sedative-hypnotic         | GABA-A receptor receptor modulation                    | Hypnosedation                                | 1920 | 1966 | 1985 | Sweden                                                                                                                                                    | Respiratory depression            | 4  |
| Aprotinin                         | Antifibrinolytic          | Pancreatic trypsin inhibitor                           | Bleeding                                     | 1959 | 1964 | 2007 | Worldwide                                                                                                                                                 | Anaphylaxis                       | 4  |
| Arsenate                          | Chemotherapeutic agent    | Oncoprotein expression                                 | Cancer                                       | 1951 | 1973 | 1988 | Austria, Spain, Italy, France, Philippines                                                                                                                | Drug abuse, carcinogenic          | 3  |
| Aspirin                           | Analgesic                 | COX-1 & COX-2 inhibition                               | Analgesia                                    | 1899 | 1970 | 1986 | UK, US, Hong Kong, Nigeria, Spain                                                                                                                         | Liver                             | 3  |
| Astemizole                        | Antihistamine             | H1-receptor antagonist                                 | Allergy                                      | 1977 | 1986 | 1987 | Norway, New Zealand, Philippines, USA, Canada, South Africa, UAE, Mauritius, Brunei, Tanzania, Armenia, Brazil, Spain, Argentina, Singapore, India, Chile | Cardiovascular, drug interactions | 4  |
| Azaribine‡                        | Antipsoriatic             | Inhibition of orotidine-5'-monophosphate decarboxylase | Psoriasis                                    | 1975 | 1976 | 1976 | USA; Thailand; Mauritius; Saudi Arabia; Venezuela                                                                                                         | Hematologic, psychiatric          | 4  |
| Barbital                          | Sedative-hypnotic         | GABA-A receptor modulation                             | Hypnosedation                                | 1903 | 1913 | 1971 | Italy                                                                                                                                                     | Respiratory depression            | 4  |
| Beclobrate‡                       | Antilipemic               | Activates PPAR                                         | Hyperlipidemia                               | 1985 | 1990 | 1990 | Switzerland                                                                                                                                               | Hepatotoxicity                    | 4  |
| Bendazac                          | Analgesic                 | COX-1 & COX-2 inhibition                               | Analgesia                                    | 1983 | 1987 | 1993 | Spain                                                                                                                                                     | Liver                             | 4  |
| Benfluorex‡                       | Psychostimulant           | Fenfluramine analogue                                  | Obesity                                      | 1976 | 2003 | 2009 | Europe                                                                                                                                                    | Cardiotoxicity                    | 3  |
| Benoxaprofen‡                     | Analgesic                 | COX-1 & COX-2 inhibition                               | Analgesia                                    | 1980 | 1982 | 1982 | Worldwide                                                                                                                                                 | Liver, skin, urinary tract        | 4  |

|                                                |                                                    |                                                                                       |                                         |      |      |      |                                                                                                   |                                                                           |    |
|------------------------------------------------|----------------------------------------------------|---------------------------------------------------------------------------------------|-----------------------------------------|------|------|------|---------------------------------------------------------------------------------------------------|---------------------------------------------------------------------------|----|
| Benzarone‡                                     | Thrombolytic                                       | Antagonistic on mediators of muscle contraction, direct action on smooth muscle cells | Varicose veins                          | 1964 | 1987 | 1992 | Germany, Portugal, France                                                                         | Liver                                                                     | 4  |
| Benzbromarone                                  | Uricosuric agent                                   | Xanthine oxidase inhibitor                                                            | Gout                                    | 1976 | 1994 | 2003 | Portugal, France                                                                                  | Liver                                                                     | 4  |
| Benziodarone                                   | Uricosuric agent                                   | Inhibits hURAT1                                                                       | Gout                                    | 1962 | 1964 | 1964 | UK, France, Spain                                                                                 | Liver                                                                     | 4  |
| Benzydamine (Difflam)                          | Analgesic                                          | COX-1 & COX-2 inhibition                                                              | Analgesia                               | 1967 | 1980 | 1995 | Germany                                                                                           | Skin, psychiatric, sensory                                                | 4  |
| Benzyl alcohol‡                                | Antimicrobial                                      | Alteration of bacterial membrane permeability                                         | Decontamination of IV lines in neonates | 1972 | 1981 | 1982 | Israel, USA, Oman, Iraq                                                                           | Metabolic acidosis                                                        | 4  |
| Benzylpenicillin sodium (topical preparations) | Antimicrobial                                      | Inhibits cell wall biosynthesis                                                       | Bacterial infection                     | 1944 | 1953 | 1972 | USA, Italy, Philippines, Ethiopia, Bangladesh, India, Chile, Cyprus, Spain, Thailand, Venezuela   | Skin, immune                                                              | 4  |
| Bepridil‡                                      | Antiarrhythmic                                     | Calcium channel blockers                                                              | Cardiac arrhythmia                      | 1981 | 1982 | 2004 | USA                                                                                               | Cardiovascular                                                            | 4  |
| Beta-ethoxyacetanilide                         | Analgesic                                          | Metabolized to paracetamol?                                                           | Analgesia                               | 1886 | 1978 | 1986 | Germany                                                                                           | Tumorigenicity, urinary tract                                             | 5* |
| Beztramide‡                                    | Analgesic                                          | Unknown                                                                               | Analgesia                               | 1961 | 1983 | 2004 | Netherlands                                                                                       | Overdose                                                                  | 4  |
| Bicalutamide‡                                  | Chemotherapeutic agent                             | Androgen receptor modulation                                                          | Prostate cancer                         | 1995 | 2001 | 2003 | Canada, UK                                                                                        | Accelerated deaths                                                        | 2  |
| Bismuth salts‡                                 | Antidyspepsia                                      | Unclear. Forms insoluble complexes                                                    | Dyspepsia                               | 1875 | 1930 | 1978 | France; Egypt; Japan; Greece; Austria; Bangladesh; Turkey; Mauritius; Oman; Cuba; India           | Nervous, cardiovascular                                                   | 4  |
| Bithionol                                      | Anthelmintic                                       | Exact mechanism unclear                                                               | Worm infestation                        | 1958 | 1960 | 1967 | USA, Canada, Japan                                                                                | Skin                                                                      | 4  |
| Boric acid and borates‡                        | Antimicrobial                                      | Destruction or inhibition of growth of pathogenic organisms                           | Skin rash                               | 1875 | 1945 | 1990 | Ireland, Malaysia, Korea, Philippines, Thailand, Germany, Japan, Costa Rica, UK, India, Peru, USA | Deaths from neurotoxicity                                                 | 4  |
| Bovine tissue-derived medicines‡               | Various: heparin, glucagon, insulin, blood factors | Various                                                                               | Various                                 | 1982 | 1986 | 1989 | Ireland, Switzerland, France                                                                      | Neurotoxicity                                                             | 4  |
| Bromfenac‡                                     | Analgesic                                          | COX-1 & COX-2 inhibition                                                              | Analgesia                               | 1997 | 1998 | 1998 | USA, Saudi Arabia                                                                                 | Liver                                                                     | 4  |
| Bromisoval                                     | Sedative-hypnotic                                  | Similar to barbiturates                                                               | Hypnosedation                           | 1909 | 1930 | 1987 | Netherlands                                                                                       | Drug dependence                                                           | 4  |
| Bromocriptine mesylate‡                        | Anti-lactation                                     | D2 and D3 agonist                                                                     | Lactation prevention                    | 1976 | 1983 | 1989 | USA                                                                                               | Cardiovascular, drug interactions, nervous system, pregnancy, psychiatric | 4  |
| Brotizolam                                     | Sedative-hypnotic                                  | GABA-A receptor modulation                                                            | Hypnosedation                           | 1982 | 1983 | 1989 | UK                                                                                                | Tumorigenicity                                                            | 5* |
| Broxyquinoline                                 | Antiprotozoal                                      | Production of free radicals                                                           | Amoebiasis                              | 1960 | 1968 | 1970 | Japan, UAE, Saudi Arabia                                                                          | Sensory                                                                   | 4  |
| Bucetin                                        | Analgesic                                          | Phenacetin analogue                                                                   | Analgesia                               | 1968 | 1985 | 1986 | Germany                                                                                           | Urinary tract: Mutagenic, carcinogenic                                    | 5* |

|                         |                   |                                                               |                                       |      |      |      |                                    |                                                 |    |
|-------------------------|-------------------|---------------------------------------------------------------|---------------------------------------|------|------|------|------------------------------------|-------------------------------------------------|----|
| Budipine                | Antiparkinsonian  | Muscarinic & NMDA receptor antagonist                         | Parkinson's                           | 1979 | 2000 | 2000 | Germany                            | Cardiovascular                                  | 4  |
| Bufexamac               | Analgesic         | COX-1 & COX-2 inhibition                                      | Analgesia                             | 1973 | 1973 | 1990 | France                             | Skin                                            | 4  |
| Buflomedil‡             | Vasodilator       | α-adrenergic blockade                                         | Peripheral arterial occlusive disease | 1970 | 1981 | 2006 | France, Europe                     | Neurotoxicity; cardiotoxicity                   | 4  |
| Buformin‡               | Hypoglycemic      | Reduce gluconeogenesis                                        | Diabetes                              | 1950 | 1969 | 1978 | Germany, Austria, Belgium, Ireland | Metabolism                                      | 4  |
| Bumadizone injection    | Analgesic         | COX-1 & COX-2 inhibition                                      | Rheumatism                            | 1972 | 1978 | 1986 | Oman                               | Hematologic                                     | 5* |
| Bunamiodyl‡             | Radiography       | Selective secretion in bile                                   | Radiography                           | 1958 | 1962 | 1964 | USA, Sweden, Venezuela             | Kidney                                          | 4  |
| Buprenorphine‡          | Analgesic         | Agonist-antagonist opioid receptor modulator                  | Analgesia                             | 1978 | 1983 | 1986 | Egypt                              | Fatalities (IV use)                             | 4  |
| Bupropion               | Antidepressant    | Norepinephrine-dopamine reuptake inhibitor                    | Depression                            | 1985 | 1985 | 1986 | USA                                | Nervous system                                  | 4  |
| Butamben                | Anesthetic        | ↓ neuronal membrane permeability to sodium ions               | Local anesthesia                      | 1923 | 1947 | 1964 | UK                                 | Allergic, psychiatric, skin                     | 4  |
| Cadralazine             | Antihypertensive  | Peripheral arteriolar vasodilator                             | Hypertension                          | 1989 | 1991 | 1992 | Norway                             | Immunologic                                     | 2  |
| Camazepam               | Sedative-hypnotic | GABA-A receptor modulation                                    | Hypnosedation                         | 1978 | 1984 | 1984 | Netherlands                        | Immunologic                                     | 4  |
| Canrenone               | Antihypertensive  | Diuresis, aldosterone antagonist                              | Aldosteronism, CHF, hypertension      | 1966 | 1976 | 1986 | Germany                            | Tumorigenicity                                  | 5* |
| Carbinoxamine           | Antihistamine     | Competes with free histamine for binding at HA-receptor sites | Allergy                               | 1953 | 1987 | 2008 | Iraq                               | Neurotoxicity                                   | 4  |
| Carisoprodol            | Muscle relaxant   | Unknown                                                       | Sprain, muscle injury                 | 1959 | 2002 | 2007 | Sweden, EU, Indonesia              | Abuse                                           | 4  |
| Cartilage + bone marrow | Antiarthritic     |                                                               | Degenerative joint disease            | 1960 | 1989 | 1992 | Germany                            | Skin                                            | 3  |
| Catechic extract‡       | Antiinflammatory  | Unclear                                                       | Benign prostatic hyperplasia          | 1972 | 1979 | 1982 | France                             | Hematologic                                     | 4  |
| Cefaloridine            | Antimicrobial     | Disruption of cell wall synthesis                             | Bacterial infection                   | 1964 | 1969 | 1989 | Spain                              | Nephrotoxic                                     | 4  |
| Celecoxib (Onsenal) ‡   | Analgesic         | COX-2 inhibitor                                               | Familial adenomatous polyposis        | 2003 | 2006 | 2011 | Europe                             | Increased risk of serious cardiovascular events | 3  |
| Cell preparations‡      | Antiageing        |                                                               | Adjuvant; antiaging                   | 1931 | 1957 | 1987 | Austria, Germany, Switzerland      | Immunologic                                     | 4  |
| Cerivastatin‡           | Antilipemic       | HMG CoA reductase inhibition                                  | Hyperlipidemia                        | 1997 | 1998 | 2001 | Worldwide                          | Renal, musculoskeletal                          | 4  |
| Chenodeoxycholic acid   | Antilipemic       | ↓ cholesterol saturation of bile                              | Cholelithiasis (gallstones)           | 1975 | 1976 | 1987 | Norway                             | Tumorigenicity                                  | 5* |
| Chloral hydrate         | Sedative-hypnotic | GABA receptor modulation                                      | Hypnosedation                         | 1869 | 1986 | 2001 | USA, France, India                 | Tumorigenicity                                  | 5* |
| Chloramphenicol         | Antimicrobial     | Disruption of cell wall synthesis                             | Bacterial infection                   | 1947 | 1950 | 1978 | France, Spain, Hungary, India      | Hematologic                                     | 4  |

|                               |                        |                                             |                                    |      |       |      |                                                                                                                                                                                                                                   |                                                      |    |
|-------------------------------|------------------------|---------------------------------------------|------------------------------------|------|-------|------|-----------------------------------------------------------------------------------------------------------------------------------------------------------------------------------------------------------------------------------|------------------------------------------------------|----|
| Chlormadinone acetate         | Hormones               | Inhibition of ovulation                     | Contraception                      | 1965 | 1970  | 1972 | USA, UK, Italy, Egypt, Venezuela                                                                                                                                                                                                  | Tumorigenicity                                       | 5* |
| Chlormezanone                 | Muscle relaxant        | GABA receptor modulation                    | Anxiolytic, muscle sprain & injury | 1960 | 1983  | 1996 | Worldwide                                                                                                                                                                                                                         | Skin, drug dependence, liver                         | 4  |
| Chlornaphazine                | Chemotherapeutic agent | Cell hydrolysis                             | Polycythemia & Hodgkin's disease   | 1964 | 1964  | 1964 | Denmark, Venezuela                                                                                                                                                                                                                | Tumorigenicity                                       | 4  |
| Chloroform (trichloromethane) | Anesthetic             | Depression of the respiratory centres       | Anesthesia                         | 1847 | 1976  | 1976 | Greece, Turkey, Japan, USA, Panama, Saudi Arabia, Brazil, Italy, Canada, Norway, Philippines, UK, Denmark, NZL, Ethiopia, Zimbabwe, Bangladesh, Dominican Republic, Belgium, Nigeria, Ireland, Oman, Cuba, India                  | Cardiovascular, liver, tumorigenicity, urinary tract | 5* |
| Chloroquine                   | Antiprotozoal          | Cell lysis                                  | Malaria                            | 1939 | 1959  | 1975 | Japan, Guinea Bissau                                                                                                                                                                                                              | Eyes                                                 | 4  |
| Chlorphentermine              | Psychostimulant        | TAAR1 agonist                               | Obesity                            | 1962 | 1970§ | 1969 | Germany, Venezuela                                                                                                                                                                                                                | Respiratory, cardiovascular                          | 5* |
| Chorionic gonadotrophin       | Hormones               | Spermatogenesis                             | Hypogonadism                       | 1934 | 1961  | 1972 | USA                                                                                                                                                                                                                               | Immunologic                                          | 4  |
| Cianidanol‡                   | Antioxidant            | Free radical scavenger                      | Hepatitis                          | 1976 | 1980  | 1985 | Worldwide                                                                                                                                                                                                                         | Hematologic                                          | 4  |
| Cincophen                     | Analgesic              | Adrenal stimulation                         | Gout                               | 1910 | 1923  | 1991 | Germany, Italy                                                                                                                                                                                                                    | Liver                                                | 4  |
| Cinepazide                    | Vasodilator            | Phosphodiesterase inhibition                | Cerebrovascular disease            | 1974 | 1985  | 1988 | Egypt, Spain                                                                                                                                                                                                                      | Hematologic                                          | 4  |
| Cisapride monohydrate‡        | Prokinetic agent       | 5-HT4 receptor agonist                      | Gastro-esophageal reflux           | 1993 | 1993  | 2000 | Philippines, Oman, USA, Germany, UK, Serbia, Mauritius, Canada, Brunei, Turkey, Indonesia, Singapore, Japan, Cuba, Bahrain, Australia, Armenia, India                                                                             | Cardiovascular, drug interactions                    | 4  |
| Cliobutinol                   | Antitussive            | Unclear                                     | Cough                              | 1961 | 2004  | 2007 | Europe, Argentina                                                                                                                                                                                                                 | Cardiovascular                                       | 4  |
| Clioquinol                    | Antimicrobial          | Inhibition of DNA replication               | Diarrhea                           | 1934 | 1964  | 1970 | Japan, Norway, Sweden, Denmark, UAE, Nigeria, Bangladesh, Philippines, Italy, Nepal, Dominican Republic, Zimbabwe, Spain, Hong Kong, Ethiopia, Honduras, Oman, Pakistan, Ghana, Libya, Bahrain, Netherlands, Saudi Arabia, Canada | Nervous system                                       | 4  |
| Clobenzorex                   | Psychostimulant        | Similar to amphetamine                      | Obesity                            | 1966 | 1986  | 2000 | Mauritius, USA                                                                                                                                                                                                                    | Drug abuse, psychiatric                              | 4  |
| Clofenotane                   | Pesticide              | Interfere with voltage-gated sodium channel | Pediculosis                        | 1945 | 1969  | 1972 | USA                                                                                                                                                                                                                               | Carcinogenicity                                      | 5* |
| Clofibrate‡                   | Antilipemic            | Activates PPAR                              | Hyperlipidemia                     | 1967 | 1973  | 1978 | Germany, Israel, Norway, Bangladesh                                                                                                                                                                                               | Accelerated deaths                                   | 4  |

|                                                  |                   |                                                   |                                    |      |      |      |                                                 |                                                             |    |
|--------------------------------------------------|-------------------|---------------------------------------------------|------------------------------------|------|------|------|-------------------------------------------------|-------------------------------------------------------------|----|
| Cloforex                                         | Psychostimulant   | Similar to amphetamine                            | Obesity                            | 1965 | 1967 | 1967 | Germany, Sweden, Venezuela                      | Cardiovascular, drug abuse, psychiatric                     | 4  |
| Clomacron                                        | Analgesic         | COX-1 & COX-2 inhibition                          | Analgesia                          | 1966 | 1970 | 1982 | UK                                              | Liver                                                       | 4  |
| Clometacin‡                                      | Analgesic         | COX-1 & COX-2 inhibition                          | Analgesia                          | 1971 | 1981 | 1990 | France                                          | Liver, skin, urinary tract                                  | 4  |
| Clozapine                                        | Antipsychotic     | Unknown                                           | Schizophrenia                      | 1972 | 1975 | 1975 | Finland, Singapore, Norway                      | Cardiovascular, hematologic                                 | 4  |
| Cobalt                                           | Hematinic         | As cobalamin                                      | Iron-deficiency anemia             | 1951 | 1954 | 1967 | USA, Kuwait                                     | Cardiovascular, liver                                       | 4  |
| Codeine                                          | Analgesic         | G-protein receptor modulation                     | Analgesia                          | 1832 | 1951 | 1985 | Bangladesh, Malaysia                            | Abuse                                                       | 4  |
| Co-proxamol (paracetamol + dextropropoxyphene) ‡ | Analgesic         | ?COX-3 inhibition; agonist at mu opioid receptors | Analgesia                          | 1957 | 1960 | 2007 | Europe, India, USA, Zimbabwe, New Zealand, Iraq | Overdose; respiratory depression; cardio and hepatotoxicity | 4  |
| Coumarin (synthetic) ‡                           | Anticoagulant     | Vitamin K reductase inhibition                    | Lymphedema post-radiation          | 1996 | 1996 | 1996 | France, Australia                               | Liver                                                       | 4  |
| Cupric bisquinoline                              | Antiarthritic     | Antiinflammatory with penicillamine complex       | Rheumatism                         | 1958 | 1967 | 1978 | France                                          | Neuromuscular                                               | 5* |
| Cyclandelate                                     | Vasodilator       | Direct effect on vascular smooth muscle           | Raynaud's disease                  | 1987 | 1989 | 1996 | USA                                             | Not effective for use                                       | 4  |
| Cyclobarbital                                    | Sedative-hypnotic | GABA-A receptor receptor agonist                  | Hypnosedation                      | 1962 | 1974 | 1980 | Norway, France                                  | Drug dependence, drug overdose                              | 4  |
| Cyclofenil                                       | Anti-hormone      | Estrogen receptor modulation                      | Scleroderma                        | 1970 | 1980 | 1987 | France                                          | Liver                                                       | 3  |
| Cyclovalone + retinol + tiratricol‡              | Choleretic        | ?                                                 | Hyperlipidemia, dyspepsia, obesity | 1964 | 1984 | 1988 | France                                          | Liver                                                       | 4  |
| Cyproheptadine                                   | Antihistamine     | Antihistamine, anticholinergic                    | Allergy, anorexia                  | 1961 | 1977 | 1982 | Bangladesh, Malaysia, UK                        | Drug abuse                                                  | 4  |
| Dalkon shield                                    | Hormones          | Prevention of fertilization                       | Contraception (IUD)                | 1971 | 1974 | 1974 | USA, UK, New Zealand                            | Septic abortions                                            | 4  |
| Danthron ( chrysazin)                            | Laxative          | ?                                                 | Constipation                       | 1959 | 1985 | 1987 | Norway, Germany, Japan, USA, Singapore, Canada  | Tumorigenicity                                              | 5* |
| Datura                                           | Analgesic         | Muscarinic receptor antagonist (atropine)         | Asthma                             | 1920 | 1962 | 1992 | France                                          | Drug abuse                                                  | 4  |
| Dequalinium chloride                             | Lozenges          | ?                                                 | Disinfectant                       | 1956 | 1970 | 1984 | Greece                                          | Low efficacy, skin reactions                                | 4  |
| Desensitizing vaccines                           | Vaccines          | ?                                                 | Viral infection                    | 1973 | 1985 | 1989 | UK                                              | Immunologic                                                 | 4  |
| Dexamfetamine                                    | Psychostimulant   | Adrenergic receptor agonist                       | Narcolepsy, ADHD                   | 1937 | 1966 | 1973 | USA, Turkey, Oman, Nigeria                      | Drug abuse and dependence                                   | 4  |

|                              |                  |                                                        |                             |      |      |                   |                                                          |                                              |    |
|------------------------------|------------------|--------------------------------------------------------|-----------------------------|------|------|-------------------|----------------------------------------------------------|----------------------------------------------|----|
| Dexfenfluramine              | Psychostimulant  | Serotonin receptor agonist                             | Obesity                     | 1995 | 1995 | 1997              | USA, Canada, Morocco, Philippines, Lithuania, India      | Cardiovascular, respiratory                  | 4  |
| Diacetyldiphenolisatin       | Laxative         | Phenacetin analogue                                    | Diarrhea                    | 1971 | 1971 | 1971              | Australia                                                | Liver                                        | 4  |
| Diamthazole                  | Antimicrobial    | ?                                                      | Fungal infection            | 1951 | 1953 | 1972              | US, France                                               | Nervous system, psychiatric                  | 4  |
| Dibenzepine hydrochloride‡   | Antidepressant   | Norepinephrine reuptake inhibitor                      | Depression                  | 1963 | 1967 | 1983              | Sweden                                                   | Suicides                                     | 4  |
| Dibromsalan                  | Antimicrobial    | ?                                                      | Bacterial infection         | 1962 | 1966 | 1975              | USA, Japan                                               | Skin                                         | 4  |
| Diclofenac sodium            | Analgesic        | COX-1 & COX-2 inhibition                               | Analgesia                   | 1979 | 1979 | 1983              | Philippines, Norway                                      | Hematologic, tumorigenicity                  | 4  |
| Dicycloverine                | Antispasmodic    | Muscarinic anticholinergic                             | Irritable bowel syndrome    | 1952 | 1974 | 1986              | Bangladesh, Norway                                       | Nervous, psychiatric                         | 4  |
| Dienestrol                   | Hormones         | Estrogen receptor agonist                              | Hormone replacement therapy | 1947 | 1972 | 1977              | Austria, Italy, Kuwait, Saudi Arabia                     | Carcinogenicity                              | 3  |
| Diethyl-aminoethoxyhexestrol | Antianginal      | ?                                                      | Angina pectoris             | 1964 | 1970 | 1970              | Japan                                                    | Liver                                        | 3  |
| Diethylstilbestrol           | Hormones         | Uterine desensitization, local arteriolar constriction | Threatened abortion         | 1938 | 1971 | 1973              | Panama, Austria, Kuwait, Italy                           | Tumorigenicity                               | 3  |
| Difemerine                   | Antispasmodic    | Muscarinic antagonist                                  | GI spasms                   | 1967 | 1980 | 1986              | Germany, France, USA                                     | Nervous system                               | 4  |
| Difenoxin                    | Antispasmodic    | Opioid receptor agonist                                | Diarrhea                    | 1970 | 1979 | 1991              | Pakistan, Oman, South Korea, Lebanon                     | Atropism                                     | 2  |
| Difurazone                   | Antimicrobial    | ?                                                      | Bacterial infection         | 1966 |      | 1977              | Japan, Saudi Arabia, Venezuela                           | Superseded by safer products                 | 5  |
| Dihydrostreptomycin          | Antimicrobial    | Protein synthesis inhibitor                            | Bacterial infection         | 1947 | 1949 | 1970              | USA, Philippines, Spain, Dominican Republic, Italy, Peru | Nervous system, psychiatric, sensory systems | 3  |
| Dihydroxy-methylfuratrizine  | Antimicrobial    | Nitrofurane analogue                                   | Bacterial infection         | 1975 | 1975 | 1977              | Japan, Saudi Arabia, Venezuela                           | Tumorigenic                                  | 5* |
| Diiododiethyltin‡            | Antimicrobial    | ?                                                      | Bacterial infection         | 1954 | 1955 | 1957              | France                                                   | Nervous system                               | 4  |
| Dilevalol                    | Antihypertensive | Nonselective beta blocker; beta-2 receptor agonist     | Hypertension                | 1989 | 1989 | 1990              | Worldwide                                                | Liver                                        | 4  |
| Dinitrophenol                | Organic compound | Uncoupling of oxidative phosphorylation                | Obesity                     | 1933 | 1933 | 1938 <sup>A</sup> | USA                                                      | Cataracts, agranulocytosis                   | 4  |
| Dinoprostone                 | Prostaglandin    | Direct vasodilator                                     | Induction of labour         | 1971 | 1987 | 1990              | UK                                                       | Fetal distress; uterine hypertonia           | 3  |
| Diphenazine (quietidin)      | Analgesic        | ?                                                      | Analgesia                   | 1962 | 1967 | 1967              | Hungary, Venezuela                                       | Photosensitivity                             | 4  |

|                              |                     |                                                 |                        |      |      |      |                                                                             |                                                          |   |
|------------------------------|---------------------|-------------------------------------------------|------------------------|------|------|------|-----------------------------------------------------------------------------|----------------------------------------------------------|---|
| Diphenoxylate                | Antispasmodic       | Opioid receptor agonist                         | Diarrhea               | 1956 | 1969 | 1990 | Libya, Pakistan, Mexico, Nepal, Philippines, South Korea, Lebanon, Thailand | Nervous system                                           | 4 |
| Dithiazanine iodide‡         | Anthelmintic        | Interruption of glucose uptake in cells         | Worm infestation       | 1959 | 1960 | 1964 | USA; France; Chad; Italy; Cuba                                              | Cardiovascular, metabolism                               | 4 |
| Dofetilide                   | Antiarrhythmic      | Potassium channel blocker                       | Cardiac arrhythmia     | 1999 | 1999 | 2004 | Europe                                                                      | Cardiovascular                                           | 2 |
| Dolansetron                  | Propulsive          | 5-HT3 receptor antagonist                       | Emesis                 | 1997 | 2005 | 2011 | Germany                                                                     | Cardiovascular                                           | 4 |
| Domperidone (injectable) ‡   | Propulsive          | Dopamine receptor antagonist                    | Emesis, GERD           | 1979 | 1982 | 1985 | Worldwide                                                                   | Cardiovascular, drug overdose, endocrine, nervous system | 4 |
| Doxycycline (IV) ‡           | Antimicrobial       | Protein synthesis inhibitor                     | Bacterial infection    | 1959 | 1984 | 1989 | France, Morocco                                                             | Anaphylaxis                                              | 4 |
| Doxylamine/dicyclomine       | Antihistamine       | H1-receptor blocker                             | Allergy, hyperemesis   | 1956 | 1981 | 1983 | UK, USA                                                                     | Teratogenicity                                           | 3 |
| Drotrecogin alfa (activated) | Antithrombotic      | Unclear                                         | Sepsis                 | 2001 | 2001 | 2011 | Worldwide                                                                   | Insufficient evidence; bleeding risk                     | 1 |
| Droperidol                   | Antipsychotic       | Dopamine 2 receptor antagonist                  | Psychoses              | 1970 | 1991 | 2001 | UK, Indonesia                                                               | Cardiovascular; deaths                                   | 4 |
| Droxicam                     | Analgesic           | COX-1 & COX-2 inhibition                        | Analgesia              | 1990 | 1992 | 1994 | Europe                                                                      | Liver                                                    | 4 |
| Ebrotidine‡                  | Anti-ulcer          | H2 receptor antagonist                          | Peptic ulcer           | 1997 | 1998 | 1998 | Spain, Peru                                                                 | Liver                                                    | 4 |
| Efalizumab                   | Monoclonal antibody | Inhibits CD11a                                  | Autoimmune disease     | 2003 | 2008 | 2009 | EU, USA, Canada, Mexico                                                     | Leukoencephalopathy                                      | 4 |
| Emetin (ipecac syrup)        | Emetic              | Stimulation of the CTZ, local irritation        | Emesis                 | 1912 | 1947 | 1982 | Mauritius                                                                   | Cardiotoxicity                                           | 3 |
| Encainide‡                   | Antiarrhythmic      | Na channel blocker                              | Cardiac arrhythmia     | 1985 | 1989 | 1991 | UK                                                                          | Cardiovascular                                           | 4 |
| Epinephrine (topical)        | Anesthetic          | Vasoconstriction                                | Local anesthesia       | 1899 | 1963 | 2004 | Ireland, Venezuela                                                          | Cardiovascular, nervous                                  | 4 |
| Erythryl tetranitrate        | Antihypertensive    | Nitric oxide synthesis                          | Angina pectoris        | 1955 | 1987 | 1998 | USA                                                                         | Insufficient evidence: skin                              | 4 |
| Erythromycin balleul         | Antimicrobial       | Protein synthesis inhibitor                     | Bacterial infection    | 1955 | 1975 | 1995 | France                                                                      | Teratogenic                                              | 4 |
| Erythromycin estolate        | Antimicrobial       | Protein synthesis inhibitor                     | Bacterial infection    | 1958 | 1961 | 1976 | Singapore, Greece, Sudan, Mauritius, Bangladesh, Bahrain, Denmark, Sweden   | Liver                                                    | 4 |
| Ethanol                      | Antimicrobial       | GABA-A receptor modulation, protein coagulation | Sedation, disinfectant | 1850 | 1946 | 1985 | Chile, Sri Lanka, Brazil, UAE                                               | Neurotoxicity, abuse                                     | 4 |
| Ethchlorvynil                | Sedative-hypnotic   | Unknown                                         | Hypnosedation          | 1955 | 1959 | 1978 | USA                                                                         | Drug dependence, respiratory                             | 4 |
| Ethinyl estradiol            | Hormones            | ?Gonadotropin suppression                       | Contraception          | 1943 | 1963 | 2004 | Germany, France                                                             | Venous thrombosis                                        | 3 |



|                               |                   |                                                     |                         |      |      |      |                                     |                                              |    |
|-------------------------------|-------------------|-----------------------------------------------------|-------------------------|------|------|------|-------------------------------------|----------------------------------------------|----|
| Ethyl nitrite (spirit) ‡      | Antimicrobial     | Increased GFR, nitric oxide synthesis               | Diaphoresis, GI spasm   | 1850 | 1977 | 1980 | USA                                 | Methemoglobinemia                            | 4  |
| Ethylene dichloride (topical) | Antimicrobial     |                                                     | Bacterial infection     | 1794 | 1977 | 1978 | Germany, Saudi Arabia               | Carcinogenic                                 | 5* |
| Ethylestrenol                 | Hormones          | Stimulate anabolism & inhibit catabolism            | Testosterone deficiency | 1964 | 1965 | 1982 | Bangladesh                          | Inappropriate use in malnourished children   | 4  |
| Etomidate                     | Anesthetic        | GABA-A receptor modulation                          | Anesthesia              | 1972 | 1983 | 1985 | UK                                  | Endocrine                                    | 3  |
| Etretinate                    | Retinoid          | Inhibits cell differentiation & hyperkeratinization | Psoriasis               | 1981 | 1982 | 1992 | Norway, Brazil, France, USA, Canada | Teratogenicity, tumorigenicity, death        | 5* |
| Exifone                       | Psychostimulant   | Free radical scavenger?                             | Memory deficits         | 1988 | 1989 | 1989 | France                              | Liver                                        | 4  |
| Factor IX                     | Anti-hemophilic   | Hydrolysis of disulfide bonds                       | Hemophilia              | 1952 | 1986 | 1986 | Sweden                              | HIV                                          | 4  |
| Factor VIII                   | Anti-hemophilic   | Cofactor for factor IXa                             | Hemophilia              | 1965 | 1986 | 1986 | UK                                  | HIV                                          | 4  |
| Febarbamate                   | Sedative-hypnotic | GABA-A receptor receptor modulation                 | Hypnosedation           | 1967 | 1991 | 1997 | France                              | Liver                                        | 4  |
| Felbamate‡                    | Anti-epileptic    | NMDA receptor antagonist                            | Epilepsy                | 1993 | 1993 | 1994 | USA, European Union                 | Hematologic, liver                           | 4  |
| Fenbutrazate                  | Psychostimulant   | Phenmetrazine analogue                              | Obesity                 | 1957 | 1963 | 1969 | Europe                              | Drug abuse, psychiatric                      | 2  |
| Fenclofenac‡                  | Analgesic         | COX-1 & COX-2 inhibition                            | Analgesia               | 1978 | 1984 | 1984 | Worldwide                           | Skin, tumorigenicity, urinary tract          | 4  |
| Fenclozic acid                | Analgesic         | COX-1 & COX-2 inhibition                            | Analgesia               | 1969 | 1970 | 1970 | UK, USA                             | Liver                                        | 2  |
| Fenetylline                   | Psychostimulant   | Amphetamine + theophylline properties               | ADHD, narcolepsy        | 1961 | 1962 | 1991 | Oman, Bulgaria                      | Abuse                                        | 4  |
| Fenfluramine                  | Psychostimulant   | Serotonin receptor antagonist                       | Obesity                 | 1973 | 1996 | 1997 | Worldwide                           | Cardiovascular, respiratory                  | 3  |
| Fenoterol‡                    | Antiasthmatic     | Beta 2 adrenergic agonist                           | Asthma                  | 1971 | 1987 | 1990 | New Zealand, Australia              | Death                                        | 3  |
| Fenproporex                   | Psychostimulant   | Amphetamine analogue                                | Obesity                 | 1966 | 1997 | 1999 | Europe                              | Drug abuse, psychiatric                      | 4  |
| Fentanyl hydrochloride‡       | Analgesic         | μ-opioid receptor agonist                           | Analgesia, anesthesia   | 2006 | 2006 | 2009 | Europe                              | Risk of overdose                             | 4  |
| Feprazone                     | Analgesic         | COX-1 & COX-2 inhibition                            | Analgesia               | 1978 | 1981 | 1984 | UK, Germany, Greece, Egypt          | Liver, gastrointestinal, skin, urinary tract | 4  |
| Fipexide‡                     | Nootropic         | TAAR1 receptor modulation?                          | Memory deficits         | 1973 | 1990 | 1991 | France                              | Hematologic, liver                           | 4  |

|                                  |                     |                                                                             |                                           |      |      |      |                                                           |                                                  |       |
|----------------------------------|---------------------|-----------------------------------------------------------------------------|-------------------------------------------|------|------|------|-----------------------------------------------------------|--------------------------------------------------|-------|
| Floctafenine                     | Analgesic           | COX-1 & COX-2 inhibition                                                    | Analgesia                                 | 1976 | 1976 | 1987 | Belgium                                                   | Dermatologic                                     | 4     |
| Flosequinan‡                     | Vasodilator         | Direct relaxing effects                                                     | Congestive heart failure                  | 1992 | 1992 | 1993 | UK, USA                                                   | Death                                            | 2     |
| Flosulide                        | Analgesic           | COX-2 inhibitor                                                             | Analgesia                                 | 1994 | 1995 | 1996 | Germany                                                   | Kidneys                                          | 5*    |
| Flunitrazepam                    | Sedative-hypnotic   | GABA-A receptor modulation                                                  | Hypnosedation                             | 1974 | 1979 | 1986 | South Africa, Sweden                                      | Drug abuse                                       | 4     |
| Fluproquazone                    | Analgesic           | COX-1 & COX-2 inhibition                                                    | Analgesia                                 | 1979 | 1984 | 1989 | USA                                                       | Liver                                            | 4     |
| Fluvoxamine                      | Antidepressant      | Selective serotonin re-uptake inhibitor                                     | Obsessive Compulsive disorder; depression | 1984 | 1987 | 1987 | Iceland                                                   | Teratogenicity, renotoxicity                     | 5*    |
| Furazolidone                     | Antimicrobial       | Disruption of bacterial DNA                                                 | Bacterial infection                       | 1954 | 1965 | 1977 | Japan, Iraq, Malaysia, South Korea, Lebanon, Yemen, India | Skin, hematologic, nervous, respiratory, sensory | 4     |
| Gadofosveset trisodium           | Radiography         | Binds to human serum albumin                                                | Diagnostic imaging                        | 1988 | 2006 | 2010 | European Union                                            | Kidney                                           | 3     |
| Gallopamil                       | Antiarrhythmic      | Calcium channel blockers                                                    | Cardiac arrhythmia                        | 1983 | 1985 | 2001 | Turkey                                                    | Not specified: Cardiovascular                    | 2     |
| Ganglioside (bovine)             | Glycolipids         | Dimerization of neurotrophic factor tyrosine kinases                        | Peripheral neuropathies                   | 1975 | 1985 | 1989 | Germany                                                   | Nervous system                                   | 3 & 5 |
| Gatifloxacin                     | Antimicrobial       | Inhibition of DNA gyrase                                                    | Bacterial infection                       | 1999 | 2002 | 2011 | Europe, India                                             | Dysglycemia                                      | 3     |
| Gelatin                          | Coagulant           | ?                                                                           | Bleeding                                  | 1915 | 1978 | 1978 | USA                                                       | Hematologic                                      | 4     |
| Gemfibrozil                      | Anticholesterol     | Activates peroxisome proliferator-activated receptor-alpha (PPAR $\alpha$ ) | Dyslipidemia                              | 1982 | 1982 | 1987 | Norway                                                    | Negative benefit-to-harm balance                 | 2     |
| Gemtuzumab ozogamicin‡           | Monoclonal antibody | Binds to the CD33 antigen                                                   | Leukemia                                  | 2000 | 2010 | 2010 | USA                                                       | Accelerated deaths                               | 2     |
| Genaconazole                     | Antimicrobial       | Interferes with the fungal synthesis of ergosterol                          | Fungal infection                          | 1970 | 1992 | 1992 | USA                                                       | Hepatocellular cancer                            | 5*    |
| Gentamicin (topical)             | Antimicrobial       | Interruption of protein synthesis                                           | Bacterial infection                       | 1966 | 1976 | 1994 | Netherlands, UAE                                          | Resistance                                       | 3     |
| Glafenine                        | Analgesic           | COX-1 & COX-2 inhibition                                                    | Analgesia                                 | 1965 | 1973 | 1984 | Worldwide                                                 | Urinary tract                                    | 4     |
| Glucosamine sulphate (injection) | Antiarthritic       | Precursor in biochemical synthesis of glycosylated proteins and lipids      | Rheumatism                                | 1980 | 1981 | 1986 | Germany, Egypt                                            | Immune: hypersensitivity                         | 3     |
| Glutethimide                     | Sedative-hypnotic   | Similar to barbiturates                                                     | Hypnosedation                             | 1955 | 1962 | 1980 | Norway, Zimbabwe, Pakistan, France                        | Drug abuse, drug dependence, sensory systems     | 4     |
| Glycosaminoglycan                | Antiarthritic       | ?                                                                           | Rheumatism                                | 1975 | 1982 | 1982 | Germany                                                   | Hematologic                                      | 3     |
| Grepafloxacin‡                   | Antimicrobial       | Inhibition of DNA gyrase                                                    | Bacterial infection                       | 1997 | 1999 | 1999 | Worldwide                                                 | Cardiovascular                                   | 4     |
| Guanethidine                     | Antihypertensive    | Sympathetic antagonist                                                      | Hypertension                              | 1973 | 1978 | 1986 | UK                                                        | Sensory systems                                  | 4     |

|                                                 |                         |                                        |                                  |      |      |      |                                                                                          |                                              |   |
|-------------------------------------------------|-------------------------|----------------------------------------|----------------------------------|------|------|------|------------------------------------------------------------------------------------------|----------------------------------------------|---|
| Guanofuracin                                    | Antimicrobial           | Disruption of bacterial DNA            | Bacterial infection              | 1966 |      | 1977 | Japan, Venezuela                                                                         | Safer alternatives                           | 5 |
| HA-1A (Centoxin)                                | Monoclonal antibody     | Endotoxin lipopolysaccharide           | Sepsis                           | 1991 | 1991 | 1993 | US                                                                                       | Death                                        | 2 |
| Halogenated hydroxyquinoline derivatives        | Antimicrobial           | Production of free radicals            | Amoebic dysentery                | 1949 | 1971 | 1978 | Denmark, Cyprus, Philippines, Bangladesh, Ghana, Turkey, Italy, Greece, Oman, UAE, India | Nervous                                      | 4 |
| Halogenated salicylanilides                     | Antimicrobial           | Production of free radicals            | Bacterial infection              | 1954 | 1964 | 1975 | USA, Japan                                                                               | Skin, eyes                                   | 4 |
| Heptabarb‡                                      | Sedative-hypnotic       | GABA-A receptor modulation             | Convulsion                       | 1956 | 1984 | 1984 | Sweden                                                                                   | Drug abuse                                   | 4 |
| Herpes simplex vaccines                         | Vaccines                | Herpes simplex antibodies              | Viral infection (HSV)            | 1964 |      | 1984 | Germany, Saudi Arabia, Venezuela                                                         | Potential hazards                            | 5 |
| Hexachlorophene                                 | Antimicrobial           | Production of free radicals            | Bacterial infection              | 1948 | 1968 | 1972 | Germany, Japan, Turkey, Europe, USSR, Peru                                               | Encephalopathy, mutagenicity, teratogenicity | 3 |
| Hexestrol                                       | Chemotherapeutic agent  | Nonsteroidal estrogen                  | Prostate CA                      | 1946 | 1977 | 1977 | Austria, Italy, Kuwait, Armenia, Saudi Arabia, Venezuela                                 | Carcinogenic                                 | 4 |
| Hexestrol bis (beta-diethylaminoethyl ether)    | Vasodilator             | Coronary vasodilatation                | Hypertension                     | 1952 | 1963 | 1969 | Japan                                                                                    | Hepatotoxicity                               | 4 |
| Hexobarbital‡                                   | Sedative-hypnotic       | GABA-A receptor modulation             | Convulsion                       | 1945 | 1962 | 1984 | Sweden                                                                                   | Drug abuse                                   | 4 |
| Human placental extract                         | Placenta derived tissue | ?                                      | Arthritis, eczema, acne vulgaris | 1956 | 1988 | 1994 | Germany, UK, India                                                                       | Neurotoxicity; Immune; skin                  | 4 |
| Hydrochlorothiazide + sotalol                   | Antihypertensive        | Diuresis plus beta receptor antagonist | Hypertension                     | 1970 | 1979 | 1986 | France                                                                                   | Cardiovascular, drug interactions            | 4 |
| Hydromorphone                                   | Analgesic               | Opioid receptor agonist                | Analgesia                        | 1926 | 1985 | 2005 | USA, Switzerland                                                                         | Overdose potential                           | 4 |
| Hyoscine methonitrate                           | Antispasmodic           | Muscarinic receptor antagonist         | GI spasms                        | 1947 | 1964 | 1981 | Sweden                                                                                   | Drug abuse                                   | 4 |
| Ibufenac                                        | Analgesic               | COX-1 & COX-2 inhibition               | Analgesia                        | 1961 | 1964 | 1968 | UK                                                                                       | Liver                                        | 4 |
| Indalpine                                       | Antidepressant          | SSRI                                   | Depression                       | 1983 | 1985 | 1985 | France                                                                                   | Gastrointestinal, hematologic                | 4 |
| Indometacin (Osmosin) ‡                         | Analgesic               | COX-1 & COX-2 inhibition               | Analgesia                        | 1963 | 1978 | 1983 | UK                                                                                       | Gastrointestinal; deaths                     | 4 |
| Indoprofen‡                                     | Analgesic               | COX-1 & COX-2 inhibition               | Analgesia                        | 1976 | 1982 | 1983 | Worldwide                                                                                | Carcinogenic                                 | 4 |
| Indoramin                                       | Vasodilator             | Alpha-1 adrenoceptor antagonist        | BPH, Hypertension                | 1981 | 1986 | 2011 | UK                                                                                       | Cardiovascular                               | 4 |
| Influenza virus, split, inactivated (pandremix) | Vaccines                | Antibody production                    | Viral infection (influenza)      | 2006 | 2010 | 2010 | Europe                                                                                   | Narcolepsy                                   | 3 |

|                                     |                   |                                                                         |                                   |      |      |      |                                              |                                                        |   |
|-------------------------------------|-------------------|-------------------------------------------------------------------------|-----------------------------------|------|------|------|----------------------------------------------|--------------------------------------------------------|---|
| Insulin, inhaled (Exubera)          | Hormones          | Decreased gluconeogenesis                                               | Diabetes                          | 2006 | 2008 | 2008 | USA, Europe                                  | Lung cancer                                            | 2 |
| Interferon-gamma-1b‡                | Immunomodulator   | Binds directly to the type II interferon gamma receptor IFNGR1          | Idiopathic pulmonary fibrosis     | 2002 | 2007 | 2007 | USA                                          | Accelerated deaths                                     | 2 |
| Iodinated casein                    | Hormones          | Thyroxine analogue                                                      | Obesity                           | 1944 | 1964 | 1964 | USA                                          | Endocrine, metabolism                                  | 4 |
| Iophendylate                        | Radiography       |                                                                         | Radiocontrast imaging             | 1946 | 1976 | 1987 | UK                                           | Nervous system                                         | 4 |
| Iproniazid                          | Antidepressant    | MAOI                                                                    | Depression                        | 1952 | 1958 | 1959 | Italy, Canada                                | Immunologic, liver                                     | 4 |
| Isaxonine phosphate‡                | Neurotrophic      | Muscle reinnervation                                                    | Peripheral neuropathies           | 1981 | 1983 | 1984 | France, Tunisia                              | Hematologic, liver                                     | 4 |
| Isocarboxazid                       | Antidepressant    | MAOI                                                                    | Depression                        | 1959 | 1966 | 1974 | Japan, Cuba, Venezuela                       | Metabolic                                              | 4 |
| Isoprenaline                        | Cardiac stimulant | Non-selective beta-adrenergic agonist                                   | Bradycardia & heart block, asthma | 1949 | 1968 | 1992 | Sri Lanka, UK, Australia, New Zealand        | Cardiovascular                                         | 3 |
| Isotretinoin                        | Retinoid          | Unknown; apoptosis                                                      | Cystic acne                       | 1982 | 1983 | 1988 | Denmark, Austria, Germany, Portugal, Norway, | Teratogenicity                                         | 3 |
| Isoxicam‡                           | Analgesic         | COX-1 & COX-2 inhibition                                                | Analgesia                         | 1983 | 1985 | 1985 | Worldwide                                    | Skin                                                   | 4 |
| Kaolin                              | Antidiarrheal     |                                                                         | Diarrhea                          | 1954 | 1968 | 1991 | India, Sri Lanka                             | Metabolism                                             | 4 |
| Ketoconazole‡                       | Antimicrobial     | Inhibits the cytochrome P450 14 $\alpha$ -demethylase                   | Fungal infection                  | 1976 | 1981 | 2013 | EU, Australia                                | Hepatotoxicity                                         | 1 |
| Ketoprofen (gel)                    | Analgesic         | COX-1 & COX-2 inhibition                                                | Analgesia                         | 1980 | 1983 | 2008 | Egypt, France                                | Immunologic                                            | 4 |
| Ketorolac (inj) ‡                   | Analgesic         | COX-1 & COX-2 inhibition                                                | Analgesia                         | 1989 | 1992 | 1992 | Germany, France, Jamaica                     | Gastrointestinal, skin                                 | 4 |
| Lapdap (chlorproguanil + dapsone)   | Antimalarial      | Inhibits dihydrofolate reductase                                        | Malaria                           | 2003 | 2008 | 2008 | Worldwide                                    | Hemolytic anemia                                       | 2 |
| Laropiprant / nicotinic acid        | Antilipemic       | Prostaglandin receptor blocker                                          | Facial flushing                   | 2008 | 2008 | 2008 | Worldwide                                    | Higher frequency of non-fatal but serious side effects | 2 |
| Lead oxide and lead salts (topical) | Astringent        |                                                                         | Skin tightening                   | 1892 | 1977 | 1980 | France, Denmark, Saudi Arabia, Venezuela     | Nervous (encephalopathy)                               | 4 |
| Levacytlmethadol                    | Antidote          | mu-opioid receptor agonist, nicotinic acetylcholine receptor antagonist | Opioid dependence                 | 1995 | 2001 | 2001 | Europe, USA                                  | Cardiovascular                                         | 4 |
| Levamphetamine                      | Psychostimulant   | Amphetamine analogue                                                    | Obesity                           | 1944 | 1954 | 1973 | USA, Oman, UAE                               | Drug abuse and dependence                              | 4 |
| Levamisole‡                         | Anthelmintic      | Neuromuscular depolarizing blockade                                     | Worm infestation                  | 1966 | 1976 | 1999 | US, Canada, Vietnam                          | Hematologic, nervous system                            | 3 |
| Levarterenol                        | Vasopressor       | L-norepinephrine analogue                                               | Nonhemorrhagic shock              | 1904 | 1958 | 1973 | Ireland, Venezuela                           | Nervous, cardiovascular                                | 4 |
| Lindane                             | Insecticide       | CNS stimulation                                                         | Head lice                         | 1942 | 1972 | 2001 | Brazil                                       | Toxicity                                               | 4 |

|                              |                    |                                                           |                                     |      |      |      |                                                                            |                                                                              |    |
|------------------------------|--------------------|-----------------------------------------------------------|-------------------------------------|------|------|------|----------------------------------------------------------------------------|------------------------------------------------------------------------------|----|
| Letrozole                    | Hormone antagonist | Non-steroidal aromatase inhibitor                         | Hormonally-responsive breast cancer | 2001 | 2005 | 2011 | India                                                                      | Teratogenic                                                                  | 3  |
| Loperamide (syrup & drops) ‡ | Antidiarrheal      | Opioid receptor agonist                                   | Diarrhea                            | 1975 | 1990 | 1990 | Worldwide                                                                  | Paralytic ileus                                                              | 4  |
| Loxoprofen sodium‡           | Analgesic          | COX-1 & COX-2 inhibition                                  | Analgesia                           | 1983 | 1993 | 2000 | Singapore                                                                  | Colonic ulceration                                                           | 4  |
| L-Tryptophan‡                | Antidepressant     | Converted into serotonin                                  | Depression and sleep disorders      | 1963 | 1989 | 1989 | Worldwide                                                                  | Eosinophilia-myalgia syndrome (EMS)                                          | 4  |
| Lumiracoxib‡                 | Analgesic          | COX-2 inhibitor                                           | Analgesia                           | 2006 | 2007 | 2007 | Australia, USA, Canada, Europe, New Zealand, Brazil, Philippines, Colombia | Liver                                                                        | 4  |
| Lyme disease vaccine         | Vaccines           | Immunogenicity                                            | Bacterial infection (Lyme disease)  | 1998 | 2001 | 2002 | USA                                                                        | Musculoskeletal (arthralgia)                                                 | 3  |
| Lynestrol                    | Hormones           | Inhibits gonadotropin, suppression of follicle maturation | Contraception                       | 1962 | 1970 | 1980 | Australia                                                                  | Tumorigenicity                                                               | 5* |
| Lysine amidotriazoate        | Radiography        |                                                           | Vascular diagnostics                | 1975 | 1981 | 1995 | Germany                                                                    | Cardiovascular, hematologic, immunologic, urinary tract (safer alternatives) | 5* |
| Mazindol                     | Psychostimulant    | Norepinephrine & dopamine reuptake inhibitor              | Obesity                             | 1970 | 1980 | 1987 | Oman                                                                       | Drug abuse, psychiatric (interaction with lithium)                           | 4  |
| Mebanazine                   | Antidepressant     | MAOI                                                      | Depression                          | 1963 | 1964 | 1975 | UK                                                                         | Drug interactions, liver                                                     | 4  |
| Meclozine (meclizine)        | Antihistamine      | H1 receptor antagonist                                    | Motion sickness                     | 1953 | 1963 | 1963 | Indonesia                                                                  | Teratogenic potential                                                        | 5* |
| Medifoxamine                 | Antidepressant     | Dopamine reuptake inhibitor; 5HT-receptor agonist         | Depression                          | 1983 | 1991 | 1999 | Morocco, France                                                            | Liver                                                                        | 4  |
| Mefenorex                    | Psychostimulant    | Amphetamine analogue                                      | Obesity                             | 1966 | 1995 | 1999 | Europe                                                                     | Drug abuse, psychiatric                                                      | 4  |
| Megestrol acetate            | Hormones           | Progesterone receptor agonist                             | Contraception                       | 1963 | 1975 | 1976 | Greece, Norway, Germany, New Zealand                                       | Tumorigenicity                                                               | 5* |
| Mepacrine (quinacrine)       | Antimicrobial      | Unclear                                                   | Non-surgical sterilization          | 1935 | 1953 | 1998 | India                                                                      | Carcinogenicity; ectopic pregnancy; possibly political                       | 2  |
| Mepazine                     | Antiepileptic      | Unclear                                                   | Epilepsy                            | 1955 | 1957 | 1970 | USA                                                                        | Cardiovascular, gastrointestinal, hematologic, liver, urinary tract          | 4  |
| Mephesisin                   | Muscle relaxant    | Spinal reflex inhibition                                  | Sedation, muscle relaxation         | 1948 | 1955 | 1976 | Japan, Saudi Arabia                                                        | Cardiotoxicity                                                               | 4  |

|                                 |                    |                                                 |                                 |      |      |      |                                                                                                                                                                           |                                               |    |
|---------------------------------|--------------------|-------------------------------------------------|---------------------------------|------|------|------|---------------------------------------------------------------------------------------------------------------------------------------------------------------------------|-----------------------------------------------|----|
| Meprobamate                     | Muscle relaxant    | GABA-A receptor modulation                      | Anxiety                         | 1955 | 1957 | 1981 | Sweden, Europe                                                                                                                                                            | Drug abuse                                    | 4  |
| Mercuriothiolate (thiomersal)   | Antimicrobial      | Organomercury analogue                          | Bacterial and fungal infections | 1928 | 1996 | 1999 | UK, Malaysia, Brazil                                                                                                                                                      | Nervous system, tumorigenicity, urinary tract | 4  |
| Mercury amide                   | Antimicrobial      | Organomercury analogue                          | Disinfectant                    | 1956 | 1964 | 1969 | Japan, Brazil, Philippines, France, Nigeria, Ghana, Italy, Canada                                                                                                         | Nervous system                                | 4  |
| Mercurous chloride              | Antimicrobial      | Organomercury analogue                          | Teething                        | 1796 | 1949 | 1953 | Worldwide                                                                                                                                                                 | Nervous system                                | 4  |
| Mesna                           | Detoxifying agent  | Antioxidation?                                  | Antidote for chemotherapy       | 1984 | 1985 | 1991 | Germany                                                                                                                                                                   | Anaphylaxis                                   | 4  |
| Metamfetamine (desoxyephedrine) | Psychostimulant    | TAAR1 receptor agonist                          | ADHD, obesity                   | 1944 | 1972 | 1973 | USA, Turkey, Oman, Nigeria                                                                                                                                                | Drug abuse, drug dependence                   | 4  |
| Metamizole (dipyrone) ‡         | Analgesic          | COX-1 & COX-2 inhibition                        | Analgesia                       | 1921 | 1952 | 1965 | 9 European, 11 Asian, and 5 African countries; Australia; USA; Mexico; Canada                                                                                             | Hematologic, immunologic (agranulocytosis)    | 4  |
| Methapyrilene                   | Sedative-hypnotic  | Histamine and cholinergic receptors' antagonist | Insomnia                        | 1947 | 1979 | 1979 | Germany, Dominican Republic, UK, Italy, Canada, Singapore, Hong Kong, Australia, Egypt, Panama, Brazil, Philippines, UAE, India, Oman, Chile, New Zealand, USA, Venezuela | Tumorigenicity                                | 5* |
| Methaqualone                    | Sedative-hypnotic  | GABA receptor agonist                           | Hypnosedation                   | 1965 | 1966 | 1979 | Greece, Turkey, Oman, Zimbabwe, Pakistan, Ghana, UAE, India                                                                                                               | Drug abuse                                    | 4  |
| Methiodal sodium                | Radiography        |                                                 | Urinary tract diagnostics       | 1964 | 1972 | 1975 | Sweden                                                                                                                                                                    | Muscle                                        | 4  |
| Methylandrostenolone            | Hormones           | Protein synthesis                               | Tonic                           | 1960 | 1982 | 1982 | USA, France, UK, Germany,                                                                                                                                                 | Endocrine (masculinization)                   | 4  |
| Methylhexanamine (DMAA)         | Nasal decongestant | Norepinephrine & dopamine transporter blockade  | Nasal decongestion              | 1948 | 1950 | 1983 | Worldwide                                                                                                                                                                 | Cardiovascular, nervous                       | 5* |
| Methylphenidate                 | Psychostimulant    | Dopamine-norepinephrine reuptake inhibitor      | ADHD                            | 1956 | 1961 | 1982 | Turkey, Oman, Nigeria                                                                                                                                                     | Drug abuse                                    | 4  |
| Methylrosanilinium chloride     | Antimicrobial      |                                                 | Bacterial & fungal infections   | 1890 | 1970 | 1998 | Malaysia                                                                                                                                                                  | Immunologic                                   | 4  |
| Methyprylon                     | Sedative-hypnotic  | GABA-A receptor modulation                      | Hypnosedation                   | 1955 | 1961 | 1984 | Zimbabwe                                                                                                                                                                  | Drug abuse                                    | 4  |
| Metipranolol                    | Antihypertensive   | Non-selective beta blocker                      | Hypertension                    | 1986 | 1991 | 1991 | UK                                                                                                                                                                        | Sensory systems (uveitis)                     | 4  |
| Metofoline                      | Analgesic          | Opioid receptor agonist                         | Analgesia                       | 1962 | 1965 | 1965 | USA                                                                                                                                                                       | Sensory systems                               | 5* |
| Metrizamide                     | Radiography        |                                                 | Contrast medium                 | 1977 | 1980 | 1992 | UK, Netherlands                                                                                                                                                           | Nervous system, sensory systems               | 4  |

|                                            |                     |                                                        |                                      |      |      |      |                                                         |                                                   |    |
|--------------------------------------------|---------------------|--------------------------------------------------------|--------------------------------------|------|------|------|---------------------------------------------------------|---------------------------------------------------|----|
| Metrodin                                   | Hormones            | GnRH agonist                                           | Invitro fertilization (IVF)          | 1993 | 2003 | 2003 | UK                                                      | Nervous system                                    | 4  |
| Mianserin                                  | Antidepressant      | Norepinephrine & serotonin reuptake inhibitor          | Depression                           | 1975 | 1979 | 1988 | Oman                                                    | Hematologic (agranulocytosis)                     | 4  |
| Mibefradil                                 | Antihypertensive    | Calcium channel blockers                               | Hypertension                         | 1997 | 1998 | 1998 | USA; UK; Peru; South Africa; Jamaica; Bulgaria; Armenia | Drug interactions, musculoskeletal                | 4  |
| Miglustat                                  | Enzyme inhibitor    | Glucocerebrosidase                                     | Gaucher's disease type 1             | 2002 | 2002 | 2002 | Israel                                                  | Unexplained cognitive dysfunction                 | 4  |
| Minaprine                                  | Antidepressant      | Reversible inhibitor of MAO-A                          | Depression                           | 1972 | 1983 | 1996 | France, Spain, Germany                                  | Drug abuse, nervous system                        | 4  |
| Minocycline                                | Antimicrobial       | Protein synthesis inhibitor                            | Bacterial infection                  | 1967 | 1974 | 1989 | Norway                                                  | Dizziness, vertigo                                | 4  |
| Molsidomine                                | Antianginal         | Nitric oxide synthesis                                 | Angina pectoris                      | 1972 | 1975 | 1985 | Germany                                                 | Tumorigenicity                                    | 5* |
| Moxisylyte (thymoxamine; uroalpha)         | Antianginal         | Alpha1-adrenergic antagonist                           | Benign prostatic hyperplasia         | 1989 | 1991 | 1993 | France                                                  | Liver                                             | 4  |
| Mucopolysaccharide polysulfuric acid ester | Antiarthritic       | Endogenous hyaluronate synthesis                       | Rheumatism                           | 1962 | 1987 | 1988 | Switzerland, France, Portugal, Austria                  | Skin: histochemical study                         | 4  |
| MMR vaccine (Urabe)                        | Vaccines            | Antibody production                                    | Mumps virus                          | 1983 | 1987 | 1988 | Worldwide                                               | Nervous system, psychiatric                       | 2  |
| Muzolimine‡                                | Antihypertensive    | Diuresis                                               | Hypertension                         | 1983 | 1987 | 1987 | Worldwide                                               | Nervous system                                    | 4  |
| Naftidrofuryl oxalate (IV) ‡               | Vasodilator         | 5HT2 receptor antagonist                               | Intermittent claudication            | 1974 | 1976 | 1992 | France; Germany, Spain                                  | Cardiovascular, immunologic, liver, urinary tract | 4  |
| Nandrolone decanoate (injectable)          | Hormones            | Stimulate anabolism & inhibit catabolism               | Hypogonadism                         | 1962 | 1989 | 1997 | France, Bangladesh                                      | Drug abuse                                        | 4  |
| Nandrolone phenylpropionate (injectable)   | Hormones            | Stimulate anabolism & inhibit catabolism               | Hypogonadism                         | 1959 | 1972 | 1982 | Bangladesh                                              | Drug abuse                                        | 4  |
| Natalizumab                                | Monoclonal antibody | Inhibits $\alpha4$ integrin                            | Multiple sclerosis & Crohn's disease | 2004 | 2005 | 2005 | USA                                                     | Nervous (combination)                             | 2  |
| Nebacumab‡                                 | Monoclonal antibody | Endotoxin-specific IgM                                 | Sepsis                               | 1991 | 1993 | 1993 | Worldwide                                               | Infection risk; accelerated deaths                | 2  |
| Nefazodone‡                                | Antidepressant      | 5HT2 receptor antagonist                               | Depression                           | 1994 | 1999 | 2003 | European Union; Canada; Singapore                       | Hepatotoxicity                                    | 4  |
| Neomycin sulfate (inj)                     | Antimicrobial       | Protein synthesis inhibitor                            | Bacterial infection                  | 1949 | 1967 | 1983 | Bangladesh, Philippines, Nigeria, USA; Canada           | Drug abuse, sensory systems, urinary tract        | 4  |
| Nevirapine                                 | Antimicrobial       | Non-nucleoside reverse transcriptase inhibitor (NNRTI) | HIV                                  | 1996 | 1997 | 2007 | Brazil                                                  | Liver                                             | 4  |

|                                          |                       |                                                  |                             |      |      |      |                                                                                                                             |                                                                                  |    |
|------------------------------------------|-----------------------|--------------------------------------------------|-----------------------------|------|------|------|-----------------------------------------------------------------------------------------------------------------------------|----------------------------------------------------------------------------------|----|
| Nialamide                                | Antidepressant        | MAOI                                             | Depression                  | 1959 | 1969 | 1974 | Japan, India, Cuba, Denmark, Thailand, Venezuela, Canada                                                                    | Drug interactions, liver                                                         | 4  |
| Nifedipine (10mg)                        | Antihypertensive      | Calcium channel blockers                         | Hypertension                | 1975 | 1989 | 1996 | Australia                                                                                                                   | Cardiovascular                                                                   | 4  |
| Nifuroxazide (nifuroxazine)              | Antimicrobial         | Janus kinase inhibitor                           | Diarrhea and colitis        | 1966 | 1997 | 2008 | Belgium                                                                                                                     | Immunologic, hematologic                                                         | 4  |
| Nikethamide                              | Respiratory stimulant | Unclear                                          | Tranquilizer overdose       | 1922 | 1953 | 1988 | Worldwide                                                                                                                   | Nervous system                                                                   | 4  |
| Nimesulide‡                              | Analgesic             | COX-2 inhibitor                                  | Analgesia                   | 1986 | 1998 | 1999 | Portugal, Israel, Spain, Bangladesh, Nigeria, India, Ireland, Ghana, Thailand, Vietnam                                      | Liver                                                                            | 4  |
| Niperotidine                             | Anti-ulcer            | H2 receptor antagonist                           | Peptic ulcer                | 1990 | 1995 | 1995 | Italy                                                                                                                       | Hepatotoxicity                                                                   | 4  |
| Nitrefazole‡                             | Anti-addiction        | Inhibition of aldehyde dehydrogenase             | Alcohol deterrent           | 1982 | 1984 | 1984 | Germany, Austria                                                                                                            | Liver                                                                            | 4  |
| Nitrofurazone (Nitrofurazone)            | Antimicrobial         | Unclear                                          | Bacterial infection         | 1946 | 1974 | 1977 | Japan, USA, Armenia                                                                                                         | Mutagenicity                                                                     | 5* |
| Nitroxoline                              | Antimicrobial         | ↓ in the biofilm density of <i>P. aeruginosa</i> | UTI                         | 1965 | 1966 | 1973 | Ireland, Thailand, Venezuela                                                                                                | Eyes                                                                             | 5* |
| Nomifensine‡                             | Antidepressant        | Norepinephrine-dopamine reuptake inhibitor       | Depression                  | 1976 | 1980 | 1986 | Worldwide                                                                                                                   | Hematologic, liver, respiratory                                                  | 4  |
| Norpseudoephedrine (Phenylpropanolamine) | Psychostimulant       | Adrenoreceptor agonist, D1 receptor agonist      | Nasal decongestion, obesity | 1947 | 1985 | 1987 | Germany, Brazil, Malaysia, Singapore, USA, Oman, Canada, Cuba, India, Cameroun, Nigeria, Portugal, Temor-Leste, South Korea | Hemorrhagic stroke                                                               | 4  |
| Noscapine                                | Antitussive           | σ-receptor agonist                               | Cough                       | 1959 | 1984 | 1990 | Ireland, UK, Netherlands                                                                                                    | Genotoxicity                                                                     | 5* |
| Novobiocin (cathomycin)                  | Antimicrobial         | Inhibitors of bacterial DNA gyrase               | Staphylococcal infections   | 1956 | 1957 | 1987 | Malaysia                                                                                                                    | Hematologic                                                                      | 4  |
| Omeprazole (injectable)                  | Anti-ulcer            | Proton pump inhibitor                            | Peptic ulcer                | 1989 | 1994 | 1994 | Germany                                                                                                                     | Endocrine, genotoxicity, liver, musculoskeletal, nervous system, sensory systems | 4  |
| Opium in antitussives‡                   | Antitussive           | Opioid receptor agonist                          | Recreation                  | 1812 | 1842 | 1982 | Bangladesh, Italy                                                                                                           | Drug dependence                                                                  | 4  |
| Orciprenaline (metaprotenerol)           | Bronchodilator        | Beta2 adrenoceptor agonist                       | Asthma                      | 1961 | 1972 | 2009 | UK                                                                                                                          | Cardiovascular                                                                   | 4  |
| Orgotein‡                                | Antiarthritic         | Free radical scavenging                          | Osteoarthritis              | 1968 | 1987 | 1990 | Switzerland, Germany, Portugal                                                                                              | Immunologic                                                                      | 4  |
| Oxeladin                                 | Antitussive           | Unclear                                          | Cough                       | 1972 | 1991 | 1994 | Germany, France, Armenia, Canada                                                                                            | Carcinogenic                                                                     | 5* |



|                             |                                     |                                                 |                          |      |      |      |                                                                                     |                                                      |    |
|-----------------------------|-------------------------------------|-------------------------------------------------|--------------------------|------|------|------|-------------------------------------------------------------------------------------|------------------------------------------------------|----|
| Oxolamine                   | Antitussive                         | Unclear                                         | Cough                    | 1969 | 1972 | 1984 | Netherlands                                                                         | Nervous system:<br>hallucination in children         | 4  |
| Oxomemazine‡                | Antitussive                         | Histamine and cholinergic receptors' antagonist | Cough                    | 1937 | 1979 | 1991 | European Union; USA                                                                 | Respiratory depression in children (SIDS)            | 4  |
| Oxyphenbutazone‡            | Analgesic                           | COX-1 & COX-2 inhibition                        | Analgesia                | 1955 | 1974 | 1984 | Worldwide                                                                           | Hematologic: Bone marrow suppression                 | 4  |
| Oxyphenisatin‡              | Laxative                            | ↑d mucosal tissue permeability                  | Constipation             | 1925 | 1970 | 1972 | Worldwide                                                                           | Liver                                                | 4  |
| Pangamic acid               | “Vitamin”                           | Transmethylation                                | Detoxification           | 1949 | 1980 | 1984 | Greece                                                                              | Mutagenic                                            | 5* |
| Paramomycin                 | Antimicrobial                       | Protein synthesis inhibitor                     | Bacterial infection      | 1959 | 1970 | 1989 | Spain                                                                               | Renal damage, neuromuscular blockage and ototoxicity | 4  |
| Parecoxib                   | Analgesic                           | COX-2 inhibitor                                 | Analgesia                | 2002 | 2005 | 2005 | USA, European Union                                                                 | Cardiovascular, respiratory                          | 2  |
| Pargyline                   | Antihypertensive                    | Monoamine oxidase inhibitor                     | Hypertension             | 1963 | 1964 | 1979 | Germany                                                                             | Interaction with tyramine                            | 4  |
| Pectin                      | Antidiarrheal                       | ↑d viscosity                                    | Diarrhea                 | 1936 | 1974 | 1991 | Libya, India, Sri Lanka                                                             | Metabolic                                            | 4  |
| Pemoline‡                   | Psychostimulant                     | Dopamine agonist?                               | ADHD, narcolepsy         | 1960 | 1973 | 2005 | Worldwide                                                                           | Liver: hepatotoxicity                                | 4  |
| Pentobarbital‡              | Sedative-hypnotic                   | GABA-A receptor modulation                      | Hypnosedation            | 1930 | 1953 | 1985 | Sweden                                                                              | Drug overdose                                        | 4  |
| Pentosan polysulfate sodium | Anti-thrombotic                     | Protective coating to the damaged bladder wall? | Cystitis, osteoarthritis | 1965 | 1985 | 1994 | France, USA                                                                         | Hematologic: thrombocytopenia                        | 4  |
| Pentylene-tetrazol          | Circulatory & respiratory stimulant | Unclear                                         | Convulsion               | 1934 | 1954 | 1982 | USA                                                                                 | Convulsion                                           | 4  |
| Pergolide Mesylate          | Anti-parkinsonian                   | Dopamine receptor agonist                       | Parkinson's              | 2002 | 2002 | 2007 | USA, Canada                                                                         | Cardiovascular                                       | 3  |
| Perhexiline lameate         | Antianginal                         | Inhibits mitochondrial CPT1                     | Angina pectoris          | 1974 | 1974 | 1985 | UK, Spain, France                                                                   | Hypoglycemia, liver, musculoskeletal, nervous system | 4  |
| Phenacetin                  | Analgesic                           | Metabolized to paracetamol                      | Analgesia                | 1887 | 1948 | 1965 | 16 European, 14 Asian, 5 African, 4 S. American countries. New Zealand, USA, Canada | Hematologic, liver, tumorigenicity, urinary tract    | 4  |
| Phenazone (antipyrine)      | Analgesic                           | COX-1 & COX-2 inhibition                        | Analgesia                | 1883 | 1958 | 1981 | UAE, Malaysia, Bahrain, Germany, Iraq                                               | Hematologic                                          | 4  |
| Phenazopyridine             | Analgesic                           | Unclear                                         | Urinary analgesia        | 1927 | 1978 | 1984 | Greece                                                                              | Carcinogenic                                         | 5* |
| Phendimetrazine             | Psychostimulant                     | Norepinephrine-dopamine releasing agent         | Obesity                  | 1961 | 1979 | 1982 | Turkey                                                                              | Drug abuse                                           | 4  |
| Phenformin‡                 | Hypoglycemic                        | ↓d gluconeogenesis                              | Diabetes                 | 1957 | 1963 | 1970 | 15 European & 6 Asian countries; Canada; New Zealand; Brazil; USA; Ethiopia         | Metabolic acidosis                                   | 4  |

|                                               |                   |                                            |                           |      |      |      |                                                                                        |                                             |    |
|-----------------------------------------------|-------------------|--------------------------------------------|---------------------------|------|------|------|----------------------------------------------------------------------------------------|---------------------------------------------|----|
| Phenicarbazide (phenylsemicarbazide)          | Analgesic         | Unclear                                    | Analgesia                 | 1948 | 1950 | 1979 | Ireland                                                                                | Serious adverse effects: hemolytic anemia   | 4  |
| Phenmetrazine                                 | Psychostimulant   | Norepinephrine-dopamine releasing agent    | Obesity                   | 1956 | 1959 | 1982 | Turkey, Oman, Nigeria                                                                  | Drug abuse                                  | 4  |
| Phenobarbital‡                                | Sedative-hypnotic | GABA-A receptor modulation                 | Hypnosedation, convulsion | 1912 | 1929 | 1985 | Sweden, Mauritius, France                                                              | Abuse and intoxication; skin                | 4  |
| Phenol (topical)                              | Antimicrobial     | Absorption by bacteria                     | Bacterial infection       | 1867 | 1973 | 1983 | Dominican Republic, Lithuania                                                          | Safer alternatives                          | 4  |
| Phenolphthalein                               | Laxative          | Direct action on intestinal muscles        | Constipation              | 1902 | 1953 | 1979 | Europe, Yemen, Bangladesh, Canada, France, Morocco, Oman, Japan, Saudi Arabia, Bahrain | Skin, metabolic, muscular                   | 4  |
| Phenoxypropazine                              | Antidepressant    | MAOI                                       | Depression                | 1961 | 1964 | 1966 | UK                                                                                     | Drug interactions, liver                    | 4  |
| Phentermine                                   | Psychostimulant   | TAAR1 agonist                              | Obesity                   | 1959 | 1964 | 1981 | Sweden, UAE, Mauritius, Turkey, Oman, UK, Venezuela                                    | Drug abuse                                  | 4  |
| Phentolamine mesilate                         | Antihypertensive  | Alpha-adrenergic antagonist                | Erectile dysfunction      | 1998 | 1998 | 2000 | Singapore                                                                              | Carcinogenicity                             | 5* |
| Phenylbutazone‡                               | Analgesic         | COX-1 & COX-2 inhibition                   | Analgesia                 | 1949 | 1953 | 1985 | 6 European, 6 Asian & 3 African countries; Chile; Panama                               | Hematologic, liver, urinary tract           | 4  |
| Phenylephrine                                 | Decongestant      | $\alpha$ 1-adrenergic receptor agonist     | Mydriasis                 | 1949 | 1968 | 1987 | UK                                                                                     | Eyes                                        | 4  |
| Phthalylsulfathiazole                         | Antimicrobial     | Inhibits dihydropteroate synthetase        | Bacterial infection       | 1946 | 1950 | 1982 | Bangladesh                                                                             | Granulocytopenia                            | 4  |
| Pifoxime                                      | Analgesic         | COX-1 & COX-2 inhibition                   | Analgesia                 | 1975 | 1975 | 1976 | France                                                                                 | Nervous system, psychiatric                 | 4  |
| Pioglitazone                                  | Hypoglycemic      | PPARs activation                           | Diabetes                  | 1999 | 2011 | 2011 | Europe                                                                                 | Risk of bladder CA                          | 3  |
| Pipamazine                                    | Emetic            | Phenothiazine analogue                     | Emesis                    | 1959 | 1960 | 1969 | USA                                                                                    | Lack of efficacy                            | 5  |
| Pipenzolate                                   | Anti-ulcer        | Muscarinic receptor antagonist             | Peptic ulcer              | 1960 | 1990 | 1990 | Pakistan                                                                               | Overdose potential                          | 4  |
| Piperazine                                    | Anthelmintic      | GABA receptor inhibition                   | Worm infestation          | 1949 | 1957 | 1983 | Malaysia, Armenia                                                                      | Immunologic, nervous system, tumorigenicity | 4  |
| Pipradrol                                     | Psychostimulant   | Norepinephrine-dopamine reuptake inhibitor | Obesity, narcolepsy, ADHD | 1953 | 1968 | 1982 | USA, Turkey, Denmark, Venezuela                                                        | Nervous, cardiovascular                     | 4  |
| Pirprofen‡                                    | Analgesic         | COX-1 & COX-2 inhibition                   | Analgesia                 | 1982 | 1986 | 1990 | Worldwide                                                                              | Gastrointestinal, liver, urinary tract      | 4  |
| Pituitary chorionic gonadotropin (injectable) | Hormones          | Ovulation trigger                          | Infertility               | 1930 | 1958 | 1972 | USA                                                                                    | Immunologic                                 | 4  |

|                                             |                   |                                                                            |                                       |      |      |      |                                                                                                             |                                                        |    |
|---------------------------------------------|-------------------|----------------------------------------------------------------------------|---------------------------------------|------|------|------|-------------------------------------------------------------------------------------------------------------|--------------------------------------------------------|----|
| Podophyllum resin                           | Laxative          | Mitotic spindle poison                                                     | Constipation                          | 1844 | 1962 | 1970 | Italy, France, Egypt                                                                                        | Teratogenicity                                         | 4  |
| Polidexide                                  | Antilipemic       | Anion exchange                                                             | Hyperlipidemia                        | 1974 | 1977 | 1977 | UK                                                                                                          | Oculomucocutaneous syndrome                            | 4  |
| Polyoxyethylated castor oil                 | Adjuvant          |                                                                            | Emulsifier                            | 1970 | 1973 | 1984 | Worldwide                                                                                                   | Anaphylaxis, hyperlipidemia                            | 4  |
| Polyvinylpyrrolidone (Polyvidone; povidone) | Adjuvant          | Permeability through circulatory system                                    | Suspending and dispersing of IV drugs | 1957 | 1967 | 1983 | Germany, Pakistan, Egypt, USA                                                                               | Metabolic: granulomatous lesions                       | 4  |
| Potassium arsenate                          | Tonic             | Degradation of the aberrant retinoic acid receptor $\alpha$ fusion protein | Leukemia; Psoriasis                   | 1878 | 1968 | 1980 | USA                                                                                                         | Tumorigenicity                                         | 4  |
| Potassium canrenoate                        | Antihypertensive  | Aldosterone antagonist                                                     | Hypertension, ascites                 | 1968 | 1985 | 1986 | Germany                                                                                                     | Carcinogenic                                           | 5* |
| Potassium chloride                          | Electrolyte       | Replenishment of potassium stores                                          | Hypokalemia                           | 1962 | 1964 | 1989 | Belgium, France, USA, Canada                                                                                | Gastrointestinal perforation                           | 4  |
| Potassium nitrate                           | Antihypertensive  | Nitric oxide synthesis                                                     | Hypertension                          | 1901 | 1975 | 1981 | France, Egypt, Venezuela                                                                                    | Tumorigenicity                                         | 3  |
| Practolol‡                                  | Antihypertensive  | Beta-blocker                                                               | Hypertension                          | 1970 | 1972 | 1975 | Greece, Turkey, New Zealand, Denmark, Thailand, Singapore, UK, Mauritius, India, Germany, Norway, Venezuela | Gastrointestinal, sensory systems, skin                | 4  |
| Pramipexole dihydrochloride monohydrate     | Antiparkinsonian  | Dopamine receptor agonist                                                  | Parkinson's                           | 1997 | 1999 | 2006 | Europe                                                                                                      | Sudden onset of sleep                                  | 3  |
| Prenylamine‡                                | Antianginal       | Calcium channel blocker                                                    | Angina pectoris                       | 1960 | 1973 | 1989 | Worldwide                                                                                                   | Cardiovascular: multifocal ventricular tachycardia     | 4  |
| Probucol                                    | Antioxidant       | Unclear                                                                    | Hyperlipidemia                        | 1980 | 1989 | 1989 | Germany, France, USA                                                                                        | Cardiovascular: Torsade de pointes                     | 4  |
| Proglumide                                  | Anti-ulcer        | Cholecystokinin antagonist                                                 | Peptic ulcer                          | 1970 | 1984 | 1989 | Japan, Germany                                                                                              | Respiratory                                            | 3  |
| Pronethalol                                 | Antihypertensive  | Beta-blockade                                                              | Angina pectoris                       | 1963 | 1963 | 1965 | UK                                                                                                          | Tumorigenicity                                         | 5* |
| Propanidid                                  | Anesthetic        | Unclear                                                                    | General anesthesia                    | 1963 | 1965 | 1983 | UK, Norway, France                                                                                          | Immunologic reactions                                  | 4  |
| Propofol (children) ‡                       | Anesthetic        | GABA-A receptor agonist, sodium channel blockade                           | Anesthesia                            | 1987 | 1992 | 1992 | Israel, Norway, UK, Lithuania                                                                               | Metabolic, hepatic, nervous; deaths                    | 4  |
| Propyphenazone‡                             | Analgesic         | COX-1 & COX-2 inhibition                                                   | Analgesia                             | 1951 | 1980 | 1989 | Turkey, UAE, Bahrain, Ireland                                                                               | Hematologic, Immunologic: Lyell's syndrome             | 4  |
| Proxibarbal                                 | Sedative-hypnotic | GABA-A receptor modulation                                                 | Hypnosedation                         | 1956 | 1990 | 1998 | France, Italy, Spain, Portugal and Turkey                                                                   | Hematologic, immunologic                               | 4  |
| Pseudoephedrine                             | Sympathomimetic   | Direct action on adrenergic receptors                                      | Nasal decongestion                    | 1959 | 1963 | 2008 | Iraq, Colombia, Thailand                                                                                    | Nervous, GIT, immunologic, cardiovascular, teratogenic | 3  |

|                                       |                   |                                                           |                                   |      |      |      |                                                                                |                                                   |    |
|---------------------------------------|-------------------|-----------------------------------------------------------|-----------------------------------|------|------|------|--------------------------------------------------------------------------------|---------------------------------------------------|----|
| Pumactant‡                            | Surfactant        | Lowers lung surface tension                               | Respiratory distress              | 1992 | 2000 | 2000 | UK                                                                             | “Accelerated deaths”                              | 2  |
| Purified hexavalent vaccine (Hexavac) | Vaccines          | Immunogenicity                                            | Bacterial and viral infections    | 2000 | 2005 | 2005 | Europe                                                                         | Decreased immunogenicity                          | 2  |
| Pyrithyldione/diphenhydramine         | Sedative-hypnotic | Similar to barbiturates                                   | Insomnia                          | 1940 | 1949 | 1997 | Spain                                                                          | Hematologic: agranulocytosis                      | 4  |
| Pyritinol                             | Nootropic         | Increased cerebrovascular blood flow                      | Dementia syndromes                | 1961 | 1973 | 1982 | Bangladesh                                                                     | Insufficient therapeutic value and risk of misuse | 4  |
| Pyrovalerone                          | Psychostimulant   | Norepinephrine-dopamine reuptake inhibitor                | Obesity, chronic fatigue syndrome | 1974 | 1975 | 1979 | France                                                                         | Drug abuse                                        | 4  |
| Pyrrrolizidine                        | Antitussive       | Coating effect                                            | Cough, sinusitis                  | 1967 | 1968 | 1992 | Germany, Belgium, UK                                                           | Liver                                             | 5* |
| Rapacuronium bromide‡                 | Anesthetic        | Non-depolarizing neuromuscular blocker                    | Anesthesia                        | 1999 | 1999 | 2001 | USA                                                                            | Respiratory: Bronchospasm                         | 3  |
| Remoxipride                           | Antipsychotic     | D2 receptor antagonist                                    | Psychoses, schizophrenia          | 1991 | 1993 | 1994 | Worldwide                                                                      | Hematologic                                       | 4  |
| Rimonabant                            | Psychostimulant   | Cannabinoid receptor agonist                              | Obesity                           | 2006 | 2006 | 2007 | Europe, India                                                                  | Psychiatric                                       | 1  |
| Rofecoxib‡                            | Analgesic         | COX-2 inhibitor                                           | Analgesia, osteoarthritis         | 1999 | 2002 | 2004 | Worldwide                                                                      | Cardiotoxicity                                    | 1  |
| Rosiglitazone‡                        | Hypoglycemic      | ↓d gluconeogenesis                                        | Diabetes                          | 1999 | 2007 | 2011 | UK; New Zealand; South Africa, India                                           | Cardiovascular                                    | 1  |
| Rotavirus vaccine                     | Vaccines          | Immunogenicity                                            | Rotavirus                         | 1998 | 1999 | 1999 | USA, UK                                                                        | Gastrointestinal: intussusception                 | 3  |
| Santonin‡                             | Anthelmintic      | Paralysis of nerve impulses                               | Ascariasis                        | 1911 | 1933 | 1978 | Singapore                                                                      | Neurotoxicity                                     | 4  |
| Sargramostim                          | Immunostimulator  | Granulocyte macrophage colony-stimulating factor (GM-CSF) | Bone marrow transplantation       | 1993 | 1999 | 2008 | USA                                                                            | Immune-mediated                                   | 4  |
| Secobarbital/quinalbarbital           | Sedative-hypnotic | GABA-A receptor modulation                                | Hypnosedation, convulsion         | 1934 | 1958 | 1990 | France, Norway, Netherlands, Ghana, New Zealand, Oman                          | Drug abuse                                        | 4  |
| Selegiline                            | Antiparkinsonian  | MAO-B inhibitor                                           | Parkinson's, depression, dementia | 1982 | 1991 | 1997 | USA                                                                            | Drug interaction                                  | 4  |
| Sertindole‡                           | Antipsychotic     | 5HT & D2 receptor antagonist                              | Psychoses                         | 1996 | 1996 | 1998 | UK, Bulgaria, Spain                                                            | Cardiovascular, death                             | 2  |
| Sibutramine‡                          | Psychostimulant   | Serotonin-norepinephrine reuptake inhibitor               | Obesity                           | 2001 | 2002 | 2002 | European Union; 4 Asian countries; Australia; Canada; Mexico; New Zealand; USA | Cardiovascular                                    | 4  |
| Sitaxentan sodium‡                    | Antihypertensive  | Endothelin receptor antagonist                            | Pulmonary arterial hypertension   | 2006 | 2009 | 2010 | Worldwide                                                                      | Hepatotoxicity                                    | 4  |

|                                         |                  |                                            |                        |      |      |      |                                                                                     |                                                     |    |
|-----------------------------------------|------------------|--------------------------------------------|------------------------|------|------|------|-------------------------------------------------------------------------------------|-----------------------------------------------------|----|
| Sodium dibunate (ethyl dibunate)        | Antitussive      | Unclear                                    | Cough                  | 1963 | 1968 | 1982 | Philippines                                                                         | Nervous                                             | 5* |
| Sodium hydrogen bicarbonate (pediatric) | Antacid          | Counteracts acidity                        | Indigestion            | 1966 | 1983 | 1997 | Nepal                                                                               | Safety concerns: metabolic                          | 4  |
| Somatropin (growth hormone) ‡           | Hormones         | Binds to the human growth hormone receptor | Hypopituitary dwarfism | 1973 | 1985 | 1985 | Europe; Egypt; New Zealand; USA; Oman; Thailand                                     | Infection risk: Creutzfeldt-Jakob disease           | 4  |
| Soruvudine‡                             | Antimicrobial    | Inhibits DNA polymerase                    | Herpes viral infection | 1993 | 1993 | 1993 | Germany; Japan                                                                      | Drug interactions with 5-fluorouracil               | 4  |
| Sparfloxacin                            | Antimicrobial    | Inhibits DNA gyrase                        | Bacterial infection    | 1993 | 1995 | 1995 | Europe, USA                                                                         | QTc prolongation, phototoxicity                     | 4  |
| Sparteine sulphate                      | Hormone analogue | Prostaglandin stimulation?                 | Labour                 | 1939 | 1963 | 1979 | USA                                                                                 | Uterine tetany                                      | 4  |
| Strychnine and salts                    | Aphrodisiac      | Acetylcholine receptor antagonist          | Impotence              | 1753 | 1882 | 1979 | Canada, Brazil, Bangladesh, Japan, Pakistan, UAE, Philippines                       | Nervous                                             | 4  |
| Sulfacarbamide (Sulfanilylurea)         | Antimicrobial    | Inhibits dihydropteroate synthetase        | Bacterial infection    | 1946 | 1959 | 1992 | Germany                                                                             | Hematologic, liver, skin, urinary tract             | 4  |
| Sulfadicramide (sulfacetamide)          | Antimicrobial    | Inhibits dihydropteroate synthetase        | Bacterial infection    | 1942 | 1976 | 1992 | Germany                                                                             | Negative benefit-to-harm balance: eye, skin, immune | 4  |
| Sulfadimethoxine‡                       | Antimicrobial    | Inhibits dihydropteroate synthetase        | Bacterial infection    | 1958 | 1961 | 1966 | USA                                                                                 | Skin                                                | 4  |
| Sulfadimidine                           | Antimicrobial    | Inhibits dihydropteroate synthetase        | Bacterial infection    | 1942 | 1954 | 1992 | USA; Germany; Armenia                                                               | Hematologic: thrombocytopenia                       | 4  |
| Sulfaguandine                           | Antimicrobial    | Inhibits dihydropteroate synthetase        | Bacterial infection    | 1941 | 1969 | 1971 | Dominican Republic, Iran, Turkey, Pakistan, Nepal, Germany, UAE, Denmark, Venezuela | Hematologic: agranulocytosis                        | 4  |
| Sulfamerazine sodium                    | Antimicrobial    | Inhibits dihydropteroate synthetase        | Bacterial infection    | 1943 | 1955 | 1992 | Germany                                                                             | Hematologic; skin                                   | 4  |
| Sulfamethizole                          | Antimicrobial    | Inhibits dihydropteroate synthetase        | Bacterial infection    | 1953 | 1963 | 1984 | Sweden                                                                              | Immunologic                                         | 4  |
| Sulfamethoxydiazine                     | Antimicrobial    | Inhibits dihydropteroate synthetase        | Bacterial infection    | 1962 | 1968 | 1988 | Germany                                                                             | Skin                                                | 4  |
| Sulfamethoxypyridazine                  | Antimicrobial    | Inhibits dihydropteroate synthetase        | Bacterial infection    | 1957 | 1958 | 1984 | Sweden, Pakistan, UAE, UK, Canada, Argentina, France                                | Hematologic, skin                                   | 4  |
| Sulfanilamide                           | Antimicrobial    | Inhibits dihydropteroate synthetase        | Bacterial infection    | 1936 | 1957 | 1992 | Germany                                                                             | Sensory, Immunologic                                | 4  |

|                                              |                   |                                                                             |                                        |      |      |      |                                                                          |                                                            |    |
|----------------------------------------------|-------------------|-----------------------------------------------------------------------------|----------------------------------------|------|------|------|--------------------------------------------------------------------------|------------------------------------------------------------|----|
| Sulfathiazole                                | Antimicrobial     | Inhibits dihydropteroate synthetase                                         | Bacterial infection                    | 1941 | 1954 | 1970 | USA, Philippines, Dominican Republic, France, UAE, India                 | Hematologic, liver, skin, urinary tract                    | 4  |
| Sulfisomidine                                | Antimicrobial     | Inhibits dihydropteroate synthetase                                         | Bacterial infection                    | 1952 | 1972 | 1992 | Germany                                                                  | Negative benefit-to-harm balance                           | 4  |
| Sulfonamides (topical)                       | Antimicrobial     | Inhibits dihydropteroate synthetase                                         | Bacterial infection                    | 1930 | 1957 | 1986 | Chile                                                                    | Immune-mediated                                            | 4  |
| Suloctidil‡                                  | Vasodilator       | Calcium channel blockade, inhibits thromboxane B2                           | Intermittent claudication              | 1975 | 1983 | 1985 | Worldwide                                                                | Liver: hepatotoxicity                                      | 4  |
| Suprifen with tussilax                       | Antitussive       |                                                                             | Cough                                  | 1971 | 1971 | 1972 | France, Germany                                                          | Liver: hepatotoxicity                                      | 3  |
| Suprofen                                     | Analgesic         | COX-1 & COX-2 inhibition                                                    | Analgesia                              | 1983 | 1986 | 1986 | Worldwide                                                                | Urinary tract                                              | 4  |
| Suxibuzone                                   | Analgesic         | COX-1 & COX-2 inhibition                                                    | Analgesia                              | 1974 | 1982 | 1986 | Oman, Italy                                                              | Carcinogenesis                                             | 5* |
| Technetium ( <sup>99m</sup> Tc) fanolesomab‡ | Radiography       | Radioisotope                                                                | Radiographic imaging                   | 2004 | 2005 | 2005 | USA                                                                      | Cardiovascular                                             | 4  |
| Tegaserod                                    | Antispasmodic     | 5-HT4 receptor agonist                                                      | Irritable bowel syndrome, constipation | 2002 | 2004 | 2007 | USA, Canada, India, Jordan, Australia, Switzerland, China, Argentina     | Cardiovascular                                             | 1  |
| Temafloxacin‡                                | Antimicrobial     | Inhibits DNA gyrase                                                         | Bacterial infection                    | 1991 | 1992 | 1992 | Worldwide                                                                | Hematologic, immunologic, liver, metabolism, urinary tract | 4  |
| Temazepam (gel capsules) ‡                   | Sedative-hypnotic | GABA-A receptor binding                                                     | Hypnosedation                          | 1969 | 1981 | 1999 | Australia                                                                | Drug abuse                                                 | 3  |
| Terconazole                                  | Antimicrobial     | Disrupts cell membrane permeability by cytochrome P450 14-alpha-demethylase | Fungal infection                       | 1980 | 1988 | 1991 | Sweden, Germany                                                          | Immunologic, skin                                          | 4  |
| Terfenadine‡                                 | Antihistamine     | H1-receptor antagonist                                                      | Allergy                                | 1985 | 1985 | 1997 | 3 European, 2 African, 3 Asian & 3 South American countries; USA, Canada | Cardiovascular, immunologic, liver, skin                   | 4  |
| Terodiline‡                                  | Antispasmodic     | Calcium channel blockade, blocks cholinergic receptor                       | Urinary incontinence                   | 1965 | 1989 | 1991 | Worldwide                                                                | Cardiovascular                                             | 4  |
| Testosterone propionate (injectable)         | Hormones          | Androgen-receptor modulation                                                | Hypogonadism, sexual dysfunction       | 1937 | 1952 | 1982 | Bangladesh                                                               | Drug abuse                                                 | 4  |
| Tetrabamate                                  | Anxiolytic        | Febarbamate, difebarbamate plus phenobarbital                               | Alcohol dependence                     | 1981 | 1992 | 2001 | France, Spain                                                            | Liver, skin                                                | 4  |
| Tetrachlorosalicylanilide                    | Antimicrobial     | Leakage of cell contents                                                    | Bacterial infection                    | 1949 | 1961 | 1975 | USA, Japan                                                               | Skin                                                       | 4  |

|                                 |                   |                                                                                         |                             |      |      |      |                                                                                                |                                               |    |
|---------------------------------|-------------------|-----------------------------------------------------------------------------------------|-----------------------------|------|------|------|------------------------------------------------------------------------------------------------|-----------------------------------------------|----|
| Tetracycline (pediatric)        | Antimicrobial     | Protein synthesis inhibitor                                                             | Bacterial infection         | 1948 | 1959 | 1975 | 8 Asian, 2 African, 2 Australasian countries; USA, Italy                                       | Teeth; bone                                   | 3  |
| Tetrazepam                      | Sedative-hypnotic | Benzodiazepine site agonist                                                             | Hypnosedation               | 1960 | 1988 | 2013 | EU                                                                                             | Dermatitis                                    | 4  |
| Thalidomide                     | Immunomodulator   | ? CNS mechanism                                                                         | Hyperemesis                 | 1957 | 1961 | 1961 | Belgium, Finland, Indonesia, Canada, Brazil, Denmark, India, Singapore, Venezuela, UK, Germany | Nervous system, teratogenicity                | 4  |
| Thenalidine tartrate‡           | Antihistamine     | H1-receptor blocker                                                                     | Allergy                     | 1953 | 1958 | 1958 | USA; UK; Sweden; France; Cyprus; Australia; Finland; Norway, Canada                            | Hematologic: neutropenia                      | 4  |
| Thiobutabarbital                | Sedative-hypnotic | GABA-A receptor modulation                                                              | Hypnosedation               | 1939 | 1981 | 1993 | Germany                                                                                        | Urinary tract                                 | 5* |
| Thioridazine                    | Antipsychotic     | 5HT2 receptor antagonist                                                                | Psychoses                   | 1959 | 1961 | 2000 | Worldwide                                                                                      | Retinopathy, cardiovascular                   | 4  |
| Thorium dioxide                 | Radiography       | Radiocontrast                                                                           | Diagnostic imaging          | 1928 | 1931 | 1955 | UK                                                                                             | Tumorigenicity                                | 4  |
| Tick-borne encephalitis vaccine | Vaccines          | Immunogenicity                                                                          | Viral infection             | 1999 | 1999 | 2000 | Germany                                                                                        | Hyperpyrexia                                  | 2  |
| Tienilic acid (ticrynafen) ‡    | Antihypertensive  | Loop diuretic                                                                           | Hypertension, kidney stones | 1976 | 1979 | 1980 | Greece; Philippines; USA; Brazil; Germany; Panama; France; India; Venezuela                    | Liver, urinary tract                          | 4  |
| Tilbroquinol                    | Antiprotozoal     | ?                                                                                       | Diarrhea (amoebiasis)       | 1969 | 1996 | 1997 | France, Morocco, Saudi Arabia, Switzerland                                                     | Liver, nervous system                         | 4  |
| Timonacic acid (thioprolin)     | Antioxidant       | Cysteine release and restoration of glutathione concentrations                          | Hepatitis                   | 1975 | 1981 | 1982 | France                                                                                         | Drug overdose (toxicity)                      | 3  |
| Tocainide‡                      | Antiarrhythmic    | Sodium channel blockade                                                                 | Cardiac arrhythmia          | 1981 | 1986 | 1986 | USA                                                                                            | Hematologic: agranulocytosis, aplastic anemia | 4  |
| Tolcapone‡                      | Antiparkinsonian  | COMT inhibitor                                                                          | Parkinson's                 | 1998 | 1998 | 1998 | UK; Australia; Ireland; Spain; Portugal; Lithuania; Bulgaria; Canada                           | Liver                                         | 4  |
| Tolrestat‡                      | Hypoglycemic      | Aldase reductase inhibitor                                                              | Diabetes                    | 1982 | 1995 | 1996 | Worldwide                                                                                      | Liver                                         | 2  |
| Tranlycypromine                 | Antidepressant    | MAOI                                                                                    | Depression                  | 1961 | 1963 | 1964 | Italy, Belgium, Venezuela, Canada                                                              | Cardiovascular, drug interactions             | 4  |
| Trazodone                       | Antidepressant    | Binds at 5-HT2 receptor                                                                 | Depression                  | 1973 | 1983 | 1985 | Norway                                                                                         | Carcinogenic                                  | 5* |
| Tretinoin                       | Retinoid          | Modulates cell-cycle progression, cellular differentiation, cell survival and apoptosis | Acne                        | 1973 | 1977 | 1988 | Germany                                                                                        | Carcinogenic                                  | 5* |
| Triacetyldiphenolisatin         | Laxative          | ↑d mucosal tissue permeability                                                          | Constipation                | 1961 | 1967 | 1971 | Australia, Germany, Italy, Canada, Cyprus, New Zealand, Venezuela                              | Photosensitivity; hepatotoxicity              | 4  |
| Triazolam                       | Sedative-hypnotic | GABA-A receptor binding                                                                 | Hypnosedation               | 1978 | 1978 | 1979 | Mauritius, Europe, Brazil, Oman                                                                | Nervous system, psychiatric                   | 4  |

|                                 |                   |                                                                        |                                                           |      |      |      |                                                                                                       |                                                                  |       |
|---------------------------------|-------------------|------------------------------------------------------------------------|-----------------------------------------------------------|------|------|------|-------------------------------------------------------------------------------------------------------|------------------------------------------------------------------|-------|
| Trimethobenzamide (suppository) | Antihistamine     | ?Chemoreceptor trigger zone                                            | Motion sickness, GI infections, medication-induced nausea | 1959 | 1976 | 2007 | USA                                                                                                   | Due to new FDA regulation; lack of effectiveness. Teratogenicity | 3     |
| Triparanol                      | Antilipemic       | δ 24-reductase inhibitor                                               | Hyperlipidemia                                            | 1959 | 1961 | 1962 | USA, France                                                                                           | Sensory systems, skin                                            | 4     |
| Troglitazone‡                   | Hypoglycemic      | PPARs activation                                                       | Diabetes                                                  | 1997 | 1997 | 1997 | UK; Switzerland; Peru; Jamaica; Chile, USA, Canada                                                    | Liver                                                            | 4     |
| Trovafloracin‡                  | Antimicrobial     | Inhibits DNA gyrase                                                    | Bacterial infection                                       | 1997 | 1997 | 1999 | European Union; Philippines; Syria; Vietnam; Singapore, Canada, USA                                   | Liver                                                            | 4     |
| Urethane                        | Solvent           | ?Interferes with pyrimidine metabolism                                 | Cancer (CML)                                              | 1933 | 1943 | 1963 | Brazil, Cuba, Denmark, Egypt, Japan, Thailand, USA, Canada, Italy, Greece, Denmark, Venezuela, France | Hematologic, liver, tumorigenicity                               | 5*    |
| Valdecoxib                      | Analgesic         | COX-2 inhibitor                                                        | Analgesia                                                 | 2001 | 2003 | 2005 | USA, Canada, Europe, India                                                                            | Cardiovascular; skin                                             | 2     |
| Veralipride                     | Neuroleptic       | Selective antagonism of hypothalamic D2 receptors                      | Climacteric                                               | 1979 | 1982 | 2007 | Europe, Brazil (reference to EMA)                                                                     | Psychiatric                                                      | 4     |
| Vigabatrin (gamma-vinyl-GABA)   | Antiepileptic     | Inhibits GABA transaminase (GABA-T)                                    | Hypnosedation                                             | 1989 | 1989 | 1991 | Norway                                                                                                | Not medically justified; neurotoxicity                           | 5*    |
| Vinbarbital‡                    | Sedative-hypnotic | GABA-A receptor modulation                                             | Hypnosedation                                             | 1939 | 1975 | 1984 | Sweden                                                                                                | Drug abuse                                                       | 4     |
| Vincamine                       | Nootropic         | Unclear                                                                | Meniere's disease, vertigo                                | 1955 | 1974 | 1980 | Hungary, Germany                                                                                      | Cardiovascular, hematologic                                      | 4     |
| Vitamin B complex (injectable)  | Hematinic         | Co-factor for biochemical transformation                               | Anemia                                                    | 1949 | 1953 | 2008 | Iraq                                                                                                  | Immunologic                                                      | 4     |
| Vitamin E (injectable) ‡        | Antioxidant       | Downregulation of ICAM-1 and VCAM-1                                    | Retinal deterioration in neonates                         | 1983 | 1984 | 1984 | USA                                                                                                   | Death, hematologic, liver, urinary tract                         | 3     |
| Xenazoic acid (xenalamine)      | Antimicrobial     | ? Inhibits intracellular stages viral biological cycle                 | Viral infection                                           | 1960 | 1965 | 1965 | Belgium, France, Venezuela                                                                            | Liver                                                            | 4     |
| Ximelagatran                    | Anticoagulant     | Direct thrombin inhibitor                                              | DVT, stroke                                               | 2005 | 2006 | 2006 | Europe, Brazil                                                                                        | Liver                                                            | 2     |
| Zimeldine                       | Antidepressant    | 5 HT reuptake inhibitor                                                | Depression                                                | 1982 | 1982 | 1983 | Worldwide                                                                                             | Liver, nervous system                                            | 4     |
| Zipeprol HCl‡                   | Antitussive       | Laryngeal nerve stimulation; excitation of tracheo-bronchial receptors | Cough                                                     | 1971 | 1984 | 1991 | Philippines, Brazil, Spain, Switzerland, Turkey                                                       | Drug abuse, drug dependence, nervous system                      | 4 & 5 |
| Zomepirac‡                      | Analgesic         | COX-1 & COX-2 inhibition                                               | Analgesia                                                 | 1979 | 1981 | 1983 | Worldwide                                                                                             | Immunologic, urinary tract                                       | 4     |
| Zopiclone                       | Sedative-hypnotic | GABA-A receptor binding                                                | Hypnosedation                                             | 1985 | 1985 | 1986 | Israel, Norway                                                                                        | Carcinogenicity                                                  | 5*    |

**ABBREVIATIONS:** ADHD: Attention deficit hyperactivity disorder; COMT: Catechol-O-methyl transferase; COX-1: Cyclooxygenase 1; COX-2: Cyclooxygenase 2; CPT1: Carnitine palmitoyltransferase I; CTZ: Chemoreceptor trigger zone; DNA: Deoxyribonucleic acid; D1: Dopamine 1; D2: Dopamine 2; D3: Dopamine 3; DVT: Deep venous thrombosis; GABA: Gamma-aminobutyric acid; HMG CoA: 3-hydroxy-3-methyl-glutaryl-CoA; hURAT1: Human uric acid transporter 1; H1: Histamine 1;



ICAM-1: Intercellular Adhesion Molecule 1; MAOI: Monoamine oxidase inhibitor; NMDA: N-methyl-D-aspartate; PPAR: Peroxisome proliferator-activated receptors; SSRI: Selective serotonin reuptake inhibitor; TAAR 1: Trace amine-associated receptor 1; VCAM-1: Vascular cell adhesion protein 1; 5 HT: 5-hydroxytryptamine

<sup>^</sup>Re-prohibited again in 1986 following FDA legal action (<http://www.atsdr.cdc.gov/toxprofiles/tp64.pdf>)

<sup>†</sup>Based on the Oxford Centre for Evidence-Based Medicine Levels of Evidence [13]. Level 1: Systematic review of randomized trials, systematic review of nested case-control studies, Level 2: Individual randomized trial or (exceptionally) observational study with dramatic effect; Level 3: Non-randomized controlled cohort/follow-up study (post-marketing surveillance); Level 4: Case-series, case-control, or historically controlled studies; Level 5: Mechanism-based reasoning

\*First withdrawal based on evidence from animal research

‡Products were withdrawn in association with deaths

§The first reported adverse reaction appeared after first withdrawal from the market
